1 **Misregulation of MYB16 causes stomatal cluster formation by disrupting polarity in asymmetric**  
2 **cell division**

3 Shao-Li Yang<sup>a</sup>, Ngan Tran<sup>a</sup>, Meng-Ying Tsai<sup>a</sup> and Chin-Min Kimmy Ho<sup>a,1</sup>

4 <sup>a</sup> Institute of Plant and Microbial Biology, Academia Sinica, Nangang, Taipei, Taiwan

5 <sup>1</sup> Corresponding e-mail address: [chmho@gate.sinica.edu.tw](mailto:chmho@gate.sinica.edu.tw)

6

7 **Short title:** Downregulation of MYB16 by SPEECHLESS is required for proper stomatal patterning

8

9 The author responsible for distribution of materials integral to the findings presented in this article in  
10 accordance with the policy described in the Instructions for Authors ([www.plantcell.org](http://www.plantcell.org)) is: Chin-Min  
11 Kimmy Ho ([chmho@gate.sinica.edu.tw](mailto:chmho@gate.sinica.edu.tw)).

12

13 **ABSTRACT**

14 Stomata and leaf cuticle regulate water evaporation from the plant body and balance the trade-off  
15 between photosynthesis and water loss. We identified MYB16, a key transcription factor controlling  
16 cutin biosynthesis, from previous stomatal lineage ground cell (SLGC)-enriched transcriptome study.  
17 The preferential localization of MYB16 in SLGCs but not meristemoids suggests a link between cutin  
18 synthesis and stomatal development. Here, we showed that downregulation of MYB16 in meristemoids  
19 was directly mediated by the stomatal master transcription factor, SPEECHLESS (SPCH). The  
20 suppression of MYB16 before asymmetric division was crucial for stomatal patterning because  
21 overexpression or ectopic expression of MYB16 in meristemoids increased impermeability and elevated  
22 stomatal density and clusters. The aberrant pattern of stomata was due to reduced and disrupted  
23 establishment of polarity during asymmetric cell division. Manipulating polarity by growing seedlings  
24 on hard agar rescued stomatal clusters and polarity defects in MYB16 ectopic lines. By expressing a  
25 cutinase in MYB16 ectopic lines, stomatal clustering was reduced, which suggests that the ectopic  
26 accumulation of cuticle affects the polarity in asymmetrically dividing cells and causes clustered stomata.  
27 Taken together, inhibiting MYB16 expression by SPCH in early stomatal lineage is required to correctly  
28 place the polarity complex for proper stomatal patterning during leaf morphogenesis.

29

## 30 INTRODUCTION

31 Terrestrialization is a critical event by which organisms moved from the ocean to the land. In plants,  
32 two pivotal features — stoma and the cuticle layer — evolved to adapt to major changes from water to  
33 air. Stomata are valves on the plant surface to control gas exchange and water loss. The cuticle layer is a  
34 barrier between the external environment and air-exposed plant surface. The coordination of stomata and  
35 cuticle on the epidermis balances the trade-off between photosynthesis and water evaporation.

36 In *Arabidopsis*, stomata are created by a series of asymmetric and oriented cell divisions to ensure  
37 proper stomatal density and distribution on epidermis. Stomatal lineages are initiated from the  
38 expression of SPEECHLESS (SPCH), the basic helix-loop-helix transcription factor, to drive  
39 asymmetric cell division and produce meristemoids, precursors of guard cells (MacAlister et al., 2007),  
40 and stomatal lineage ground cells (SLGCs), which may become pavement cells or reinitiate asymmetric  
41 division to produce more stomata. The stomatal pattern follows a “one-cell-spacing” rule, which means  
42 that two stomata never directly contact each other (Geisler et al., 2000).

43 Two pathways regulate stomatal patterning. One relies on cell–cell communication and the other is the  
44 establishment of polarity during asymmetric cell division. EPIDERMAL PATTERNING FACTOR (EPF)  
45 family peptide ligands including EPF1 and EPF2 are secreted from stomatal lineage cells to restrict  
46 stomatal development of neighbor cells (Hara et al., 2007; Hunt and Gray, 2009). Upon directly binding  
47 to the receptor-like kinase ERECTA family (ERf) (Lee et al., 2012), the EPF signal activates the  
48 mitogen-activated protein kinase (MAPK) cascade (Wang et al., 2007) to diminish SPCH stability  
49 (Lampard et al., 2008), which further prevents cells from entering the stomatal lineage. During  
50 asymmetric division, the polarity complex is formed in SLGCs and is integrated with MAPK signaling

51 to decrease SPCH level, ultimately breaking the stomatal fate in SLGCs (Zhang et al., 2015). The  
52 complex includes BREAKING OF ASYMMETRY IN THE STOMATAL LINEAGE (BASL), POLAR  
53 LOCALIZATION DURING ASYMMETRIC DIVISION AND REDISTRIBUTION (POLAR) and the  
54 BREVIS RADIX (BRX) family. These factors interact with each other and form a crescent to recruit  
55 MAPK components in SLGCs (Dong et al., 2009; Houbaert et al., 2018; Pillitteri et al., 2011; Rowe et  
56 al., 2019; Zhang et al., 2015). Thus, the combination of cell–cell communication, MAPK signaling and  
57 the polarity complex regulates stomatal patterning in the epidermis.

58 As compared with the dynamic behavior of stomata, cuticle layers form a physical barrier to protect  
59 tissue against dehydration. A cuticle layer consists of different kinds of lipid polymers. Cutin and waxes  
60 are two major polymer components conserved across plant species (Yeats and Rose, 2013; Bhanot et al.,  
61 2021). In *Arabidopsis*, cutin monomers are synthesized in the endoplasmic reticulum (ER) membrane,  
62 transported to the outside of cells and polymerized to become a thin layer in epidermis. LONG-CHAIN  
63 ACYL-COA SYNTHETASE 1 (LACS1) and LACS2 are essential for transforming C16/C18 fatty acid  
64 into acyl-CoA precursors for both cutin and waxes (Lü et al., 2009). Following  $\omega$ -hydroxylation and  
65 midchain hydroxylation by the cytochrome P450 enzymes CYP86A4 and CYP77A6 (Li-Beisson et al.,  
66 2009), acyl-CoA precursors are catalyzed by the GLYCEROL-3-PHOSPHATE  
67 SN-2-ACYLTRANSFERASE (GPAT) family to produce a cutin monomer, 2-monoacylglycerol  
68 (2-MAG) (Yang et al., 2010, 2012). After leaving the ER membrane, 2-MAG is then transported into the  
69 extracellular matrix (ECM) by the ATP-binding cassette (ABC) transporters ABCG11 and ABCG32  
70 (McFarlane et al., 2010; Bessire et al., 2011). Finally, ECM-localized cutin synthase polymerizes the  
71 exported 2-MAG to form cuticle layers.

72 Although most cutin biosynthesis-related genes are identified or predicted as biosynthesis enzymes,  
73 few transcription factors have been found to activate the pathway. *WAX INDUCER1/SHINE1*  
74 (*WIN1/SHN1*), an AP2 domain-containing transcription factor, was first identified from an  
75 overexpression screen and found to control wax formation (Aharoni et al., 2004; Broun et al., 2004).  
76 MYB16, an R2R3 MYB transcription factor, together with MYB106 from the same MYB subgroup  
77 (Stracke et al., 2001), could promote petal cell outgrowth and directly upregulate the expression of genes  
78 involved in cutin biosynthesis (Baumann et al., 2007; Oshima et al., 2013), which suggests a link  
79 between cuticle development and epidermal cell differentiation. In barley, the wax-deficient  
80 *eceriferum-g* mutant *cer-g* features clustered stomata (Zeiger and Stebbins, 1972). A mutation in *HIC*  
81 (*HIGH CARBON DIOXIDE*), an enzyme involved in the synthesis of very-long chain fatty acid,  
82 produced a thinner cuticle and higher stomatal density in epidermis (Gray et al., 2000). Also,  
83 overexpression of *WIN1/SHN1* decreased stomatal density (Yang et al., 2011). This evidence suggests a  
84 connection between stomatal pattern and cuticle defects.

85 Cutin may carry inhibitors or directly implement an inhibitory signal for stomatal development  
86 (Bird and Gray, 2003). Also, a cuticle layer may provide an elastic shell to regulate mechanical  
87 properties and further affect plant development (Galletti et al., 2016). Cell division and cell expansion  
88 during growth deforms the cell membrane and extracellular layer to generate surface mechanical force.  
89 Disruption of ECM reduces cell adhesion and results in disorganized tumor-like growth on shoot  
90 (Krupková et al., 2007; San-Bento et al., 2014); therefore, the tissue-wide coordination of cell–cell  
91 adhesion is important to maintain the proper patterning of a tissue. Moreover, the localization of  
92 polarized proteins could also respond to the action force from the growth direction in both leaf and shoot

93 (Heisler et al., 2010; Bringmann and Bergmann, 2017). Altered mechanical force in leaf epidermis by  
94 laser ablation leads to the redistribution of polarity proteins (Bringmann and Bergmann, 2017). In  
95 animals, elevated mechanical stress in neutrophil cells led to failed polar component recruitment and  
96 finally cessation of cell migration (Houk et al., 2012). Plants have no well-established method to  
97 manipulate the mechanical force without damaging cells, but growing seedlings on high-percentage agar  
98 plates reduced tensile stress on epidermis and rescued cell–cell gaps between epidermal cells in a cell  
99 adhesion mutant, *quasimodo1* (*quo1*) (Verger et al., 2018). Cuticle is one type of ECM. Despite no direct  
100 evidence linking mechanical force and cuticular layer on epidermis, observations from tomato fruit  
101 showed a positive correlation between cuticle thickness and stiffness (Matas et al., 2004), so the amount  
102 of cuticle affects mechanical properties on cells.

103 Transcriptome profiling of stomatal lineage cells and expression analysis revealed enrichment and  
104 preferential localization of *MYB16* in SLGCs, which raises the question of why MYB16 prefers SLGCs  
105 but not meristemoids (Ho et al., 2021). To understand the role of MYB16 in stomatal formation, here we  
106 investigated the dynamics of SPCH and MYB16 expression during asymmetric cell division and found  
107 that *MYB16* was transcriptionally downregulated by SPCH in meristemoids. Overexpression or ectopic  
108 expression of MYB16 in an early stomatal lineage resulted in clustered stomata and increased amount of  
109 cuticle in epidermis. The disrupted stomatal pattern was due to the decreased and mis-polarized polarity  
110 protein during asymmetric division. Suboptimal water potential conditions or ectopically expressing a  
111 cutinase gene, CUTICLE DESTRUCTING FACTOR 1 (CDEF1) (Takahashi et al., 2010), partially  
112 rescued stomatal clusters in the MYB16 ectopic expression line. This finding suggests that the  
113 accumulation of cutin modulates mechanical properties, thereby affecting the polarity protein behavior.

114 Appropriate MYB16 regulation in asymmetrically dividing cells is required to establish proper polarity

115 for accurate stomatal patterning.

116

117 **RESULTS**

118 **Preferential localization of MYB16 in SLGCs is due to negative regulation by SPCH in**  
119 **meristemoids**

120 Previous study has shown that *MYB16* transcripts are enriched in SLGCs and MYB16 protein is  
121 differentially expressed in SLGCs after asymmetric division (Ho et al., 2021). Because SPCH is the key  
122 player to drive asymmetric cell division and is required for stomatal fate, we further investigated the  
123 expression patterns of MYB16-YFP and SPCH-CFP in wild-type (WT) 7 days post-germination (dpg)  
124 young true leaves to observe MYB16 behaviors in a stomatal lineage. We checked the asymmetrically  
125 divided sister cells, meristemoids and SLGCs, and observed SPCH often localized in meristemoids and  
126 MYB16 localized in SLGCs (Figure 1A; Supplemental Figure 1). Further quantification of signals in an  
127 entire leaf showed that in a total of 583 pairs analyzed, SPCH was mainly in meristemoids (89.6%),  
128 whereas MYB16 was more localized in SLGCs (78.4%) (Figure 1B). However, we also observed  
129 MYB16 in a few meristemoids and pavement cells (Supplemental Figure 1). By time-lapse imaging,  
130 MYB16 could express in meristemoids, but its expression was quickly replaced by SPCH before  
131 asymmetric division (Figure 1C). These observations indicate that MYB16 localization is preferentially  
132 in SLGCs, a young cell state in epidermis, with a possible negative relationship between SPCH and  
133 MYB16.

134 In line with our hypothesis, SPCH chromatin immunoprecipitation sequencing (ChIP-seq) and  
135 induction assays have shown that the promoter of *MYB16* is bound by SPCH and *MYB16* expression is  
136 downregulated after SPCH induction (Lau et al., 2014). To confirm the direct binding of SPCH, we  
137 searched for the potential SPCH binding motif, E-box, on the *MYB16* promoter by using the PlantPAN  
138 3.0 website-based predictor (Chow et al., 2019) (Figure 1D, yellow boxes). According to the overlap



139 between E-box predictions and the SPCH binding sites derived from Lau et al. (2014) (Figure 1D, grey  
140 area), 5 sets of primers were designed for ChIP-qPCR to test SPCH binding to the *MYB16* promoter.  
141 Regions 1 to 4 but not the gene body, region 5, showed increased fold change in binding (Figure 1E). To  
142 determine whether the binding was positive or negative regulation, we used luciferase assay with  
143 ratiometric luminescent reporters to control the expression and copy number of a given construct. A  
144 ~3-kb *MYB16* promoter was fused after a mini-35S promoter to enhance the expression (Figure 1F).  
145 SPCH is known to form heterodimers with SCRM/ICE1 (Kanaoka et al., 2008), so we included  
146 SCRM/ICE1 in the assay as well. SPCH expressed alone in protoplasts conferred no change in luciferase  
147 activity as compared with the control. Co-expressing SPCH and SCRM reduced luciferase expression  
148 (Figure 1G). In summary, SPCH directly bound to the *MYB16* promoter and suppressed *MYB16*  
149 transcription with SCRM/ICE1.

#### 150 **MYB16 overexpression increased stomatal numbers and clusters**

151 MYB16 functions redundantly with MYB106, so Ho et al. (2021) used a dominant-negative form  
152 of MYB16, MYB16-SRDX, to check phenotypes. In contrast to the striking phenotype in organ fusion,  
153 MYB16-SRDX showed only slightly decreased stomatal density (stomata/area). In line with the  
154 previous observation, the *myb16-crispr* line with a pre-mature stop codon in the first exon also showed  
155 slightly reduced stomatal density (Supplemental Figure 2). To further examine whether MYB16  
156 participates in stomatal development, we created several *MYB16* inducible lines. Two, *iMYB16#2* and *#3*,  
157 showed abnormal stomatal patterns such as clusters and single guard cells under 50  $\mu$ M  $\beta$ -estradiol  
158 treatment for 4 days (Figure 2A to 2H). In contrast to the result from *myb16-crispr*, inducible lines after  
159 induction showed higher stomatal density and increased number of stomatal clusters (Figure 2I and 2J).

160 One inducible line, *iMYB16#3*, had more stomata and stomatal clusters under the mock condition  
161 (Figure 2F, 2I and 2J) because of the higher MYB16 transcript and protein expression (Figure 2K and  
162 2L). Despite the leaky effect from *iMYB16#3*, overexpression of MYB16 resulted in the formation of  
163 stomatal clusters.

#### 164 **Downregulation of MYB16 in meristemoids is required for proper stomatal patterning**

165 To understand the expression timing of MYB16 during stomatal development, we used time-lapse  
166 imaging of young true leaves expressing endogenous promoters for MYB16 and SPCH every 8 or 16 h  
167 for 4 days for a total of 7 time points. We checked the cell division events and protein localizations in  
168 three types of cells — meristemoid, SLGC and protoderm (Figure 3A). The three types of cells showed a  
169 similar pattern: co-expression of MYB16 and SPCH or SPCH alone is often found before asymmetric  
170 cell division and SPCH remains after the division (Figure 3A). To quantitatively analyze the patterns in  
171 the time-lapse images, we used the PrefixSpan algorithm (Pei et al., 2001) to explore the possible  
172 sequential events of MYB16, SPCH and cell division. A total of 156 cells with strong fluoresce signals  
173 were used. Four categories, MYB16-only, SPCH-only, co-localization and division events were noted  
174 across the 7 time points (Supplemental Figure 3A). In total, 57 patterns were generated, and the  
175 frequency represents how many cells share the pattern (Supplemental Figure 3B). Percentage frequency  
176 was calculated by frequency divided by total cell analyzed (frequency/156 cells). First, we focused on  
177 the sequential pattern of MYB16 or SPCH expression followed by cell division. The richest pattern was  
178 MYB16 and SPCH colocalization before cell division (80.8%) and the next was SPCH alone (70.5%),  
179 then MYB16 alone (31.4%) (Figure 3B), which suggests that SPCH but not MYB16 drives cell division.  
180 Second, to examine the relation between SPCH and MYB16, we checked all the possible expression

181 combinations and quantified their percentage frequency. The most common phenomenon was  
182 MYB16-SPCH colocalization followed by SPCH alone (39.1%) (Figure 3C). Together with our finding  
183 of MYB16 inhibition by SPCH, we conclude that SPCH suppresses *MYB16* in meristemoids before  
184 asymmetric division. Moreover, although MYB16 expresses in the early state of meristemoids and  
185 disappears before asymmetric division, it shows up again in young guard cells (GCs) (Figure 3D and  
186 3G). The tightly regulated expression pattern of MYB16 indicates that the timing of MYB16  
187 downregulation is critical during stomatal development.

188 Stomatal clusters have been found in plants expressing an ectopic form of MYB16,  
189 *CYP77A6p::MYB16-VP16*. The form was created by fusion with the promoter from its downstream  
190 target, *CYP77A6*, and a transcription activation domain, VP16. Of note, plants expressing MYB16  
191 driven by the promoter of another downstream target, *CYP86A4*, do not show any stomatal phenotype.  
192 (Oshima and Mitsuda, 2016) Given that stomatal clusters are in *CYP77A6p::MYB16-VP16* plants only,  
193 we wondered whether *CYP77A6* or *CYP86A4* has a distinct expression pattern in epidermis. We  
194 analyzed their transcriptional reporters by fusing promoters with nucleus-localized fluorescent protein  
195 (nucEGFP) and distinguished stomatal lineage cells by staining cell outlines with propidium iodide (PI).  
196 Because *CYP77A6* and *CYP86A4* are well-known enzymes in cutin biosynthesis, we expected that they  
197 would be expressed in every epidermal cell. However, *CYP77A6* and *CYP86A4* reporters expressed only  
198 in stomatal lineage cells (Figure 3E to 3G; Supplemental Figure 4). The fluorescence signal of  
199 *CYP77A6p::nucEGFP* was seen in meristemoids, guard mother cells, young GCs and mature GCs with  
200 a frequency of 25.6%, 22%, 27.4% and 25%, respectively. The nucEGFP signal of *CYP86A4* was seen  
201 only in young and mature GCs, 52.9 and 47.1%, respectively (Supplemental Figure 4). The expression

202 patterns and the stomatal clusters indicate the critical timing of MYB16 expression in the early stage of  
203 stomatal development.

204 BASL expresses before and after asymmetric cell division (Dong et al., 2009); therefore, its  
205 promoter as well as the *CYP77A6* promoter would be good choices for ectopic expression of MYB16 in  
206 meristemoids (Figure 3G). Similar to previous results, MYB16 expression driven by its native promoter  
207 (*MYB16p::MYB16-YFP*) was preferentially localized in SLGCs and young GCs (Figure 3H, SLGC,  
208 arrowhead). On ectopically expressing MYB16 by fusion with the *BASL* or *CYP77A6* promoter  
209 (*BASLp::MYB16-YFP* or *CYP77A6p::MYB16-VP16-YFP*), nuclear signals were restricted to stomatal  
210 lineage cells (Figure 3I and 3J, arrowheads). As compared with WT seedlings, MYB16 ectopic  
211 expression lines had higher stomatal density and the increased number of stomatal clusters (Figure 3K to  
212 3O). The high variation of stomatal density observed in *CYP77A6p::MYB16-VP16* was contributed by  
213 two types of stomatal phenotypes in seedlings (Supplemental Figure 5). Some of the seedlings had  
214 typical clustered stomata and others showed tumor-like colonies (small cell clusters), which is similar to  
215 the *basl-1* mutant (Dong et al., 2009). Together with the expression preference and timing of MYB16,  
216 the findings suggest that reduction of MYB16 expression in meristemoids is required for proper stomatal  
217 formation to prevent stomatal clustering.

## 218

### 219 **Stomatal clusters in MYB16 ectopic expression lines result from reduced and disrupted** 220 **localization of polarity protein in asymmetrically dividing cells**

221 Ectopic expression of MYB16 in stomatal lineage results in stomatal clusters. However, we did not  
222 observe any significant gene expression changes of stomatal related transcription factors — *SPCH*,

223 *MUTE*, *FAMA* and *SCRM/ICE1* (Supplemental Figure 6). This finding implies the cluster formation  
224 caused by signaling cues but not transcriptional regulation. The positional control of polarity complex is  
225 required to faithfully place EPF-mediated MAPK signaling in SLGCs to inhibit the stomatal fate (Dong  
226 et al., 2009; Houbaert et al., 2018; Pillitteri et al., 2011; Rowe et al., 2019; Zhang et al., 2015)(Figure  
227 4A). To understand how these clusters are formed, we examined cluster formation in plants expressing  
228 *BASL* promoter-driven MYB16-YFP and RC12A-mCherry, a cell membrane marker. In the normal  
229 condition, a SLGC undergoes asymmetric division to form non-adjacent stomatal precursors (Figure 4B,  
230 left). However, frequently seen in the MYB16 ectopic expression line, both sister cells entered  
231 symmetric division to form two adjacent stomata (Figure 4B, right).

232 Disruption of polarity complexes or EPF signaling could cause aberrant stomatal phenotype. We  
233 used BRXL2-CFP as an indicator to examine polarity of the polar complex in stomatal cells. The  
234 fluorescent intensity of BRXL2-CFP was markedly lower in MYB16 ectopic expression lines than in  
235 WT-background plants (Figure 4C to 4E). The upregulated expression of *POLAR*, another factor  
236 belonging to the polarity complex, in MYB16 ectopic expression plants might be due to the  
237 compensatory effects of polarity loss (Supplemental Figure 6).

238 To further characterize the polarity defects, we used three parameters to quantify cell polarity. First,  
239 we measured the tissue-wise orientation of BRXL2 by the degree  $\alpha$  of included angle between the  
240 midrib (distal-proximal axis) and cell polarity (Bringmann and Bergmann, 2017) (Figure 4F). The leaves  
241 without PI staining were used because we were concerned that the PI solution could damage the cells  
242 and further cause polarity change. Most of the BRXL2 orientation was between 30° and 60° in 7-dpg  
243 WT seedlings (Figure 4G), as previously observed (Bringmann and Bergmann, 2017). However, in

244 MYB16 ectopic expression lines, BRXL2 orientation peaked between 120° and 150° in  
245 *BASLp::MYB16-YFP* and between 60° and 90° in *CYP77A6p::MYB16-VP16* (Figure 4H and 4I). Both  
246 MYB16 ectopic expression lines shifted the BRXL2 orientation to the right (larger included angle).  
247 Second, we quantified the portion of the cells with or without a BRXL2 crescent in meristemoid–SLGC  
248 pairs. The proportion of cells with BRXL2 crescents was decreased in *BASLp::MYB16-YFP* (43%) and  
249 *CYP77A6p::MYB16-VP16* (52%) (Figure 4J). Third, the size of the faint BRXL2 signal was smaller in  
250 MYB16 ectopic expression lines than in the WT (Figure 4C to 4E). To quantify the crescent size, we  
251 used polarity degree (Zhang et al., 2015; Gong et al., 2021) — crescent length normalized by cell  
252 perimeter — and found BRXL2 length significantly shorter in both MYB16 ectopic expression lines  
253 than in the WT (Figure 4K). In summary, the adjacent stoma in MYB16 ectopic expression lines was  
254 derived from an SLGC with reduced and aberrantly oriented BRXL2.

255 To further confirm that the disrupted polarity establishment causes stomatal clusters in MYB16  
256 ectopic expression lines, we attempted to adjust the polarity defects. Although little is known about how  
257 to manipulate polarity degree in plants, one method describes using high-percentage (2.5%) agar to  
258 modulate mechanical force (Verger et al., 2018), which may further affect protein polarization. Stomatal  
259 density and clusters were rescued under high-percentage agar treatment (Figure 5A and 5B). Moreover,  
260 polarity in MYB16 ectopic expression lines was partially rescued (Figure 5C to 5H). With the same  
261 quantifying methods used in Figure 4, the orientation as well as degree of polarity were rescued in  
262 MYB16 ectopic expression plants grown on high-percentage agar (Figure 5I to 5L).

263 Cell-to-cell signaling is another way to maintain proper distribution of stomata in epidermis. To test  
264 whether ectopic expression of MYB16 blocked EPF mediated signaling, we overexpressed EPF2, a

265 major EPF ligand involved in early stomatal development, in *BASLp::MYB16-YFP* plants. Similar to the  
266 WT response, the stomatal density was reduced in *BASLp::MYB16-YFP* (Supplemental Figure 7), which  
267 suggests that cell-to-cell communication is not affected. Hence, the disruption in polarity in early  
268 stomatal development in the MYB16 ectopic expression line was the major reason for clustered stomatal  
269 formation.

### 270 **Accumulation of cutin affects stomatal development in MYB16 ectopic expression lines**

271 MYB16 is a key regulator of cuticle development (Oshima et al., 2013); therefore, we wondered  
272 whether the cuticle was affected in the MYB16 ectopic expression lines. *MYB16* and the cuticular  
273 biosynthesis-related genes *LACS1/2*, *CYP77A6* and *CYP86A4* were all upregulated in MYB16 ectopic  
274 expression lines, with no difference in expression in *GPAT4* and *GPAT8* (Figure 6A and 6B). The cluster  
275 phenotypes (Figure 2 and 3) and gene expression of ectopic expression lines were consistent with  
276 findings in the MYB16 inducible line (*iMYB16*), with all cuticular biosynthesis-related genes — *LACS1*,  
277 *LACS2*, *CYP77A6*, *CYP86A4*, *GPAT4* and *GPAT8* — upregulated under 50  $\mu$ M  $\beta$ -estradiol treatment  
278 (Supplemental Figure 8). The expression of these genes also reflects the degree of stomatal cluster  
279 phenotype, with *CYP77A6p::MYB16-VP16* having higher stomatal clusters than *BASLp::MYB16-YFP*  
280 (Figure 3O). The correlation of the expression of these enzymes and the amount of cuticle was further  
281 supported by toluidine blue (TB) penetration results (Figure 6C). The TB penetration test is often used to  
282 measure the permeability of aqueous dye into seedlings (Tanaka et al., 2004). Uptake of TB is easier in  
283 seedlings with defective than intact cuticles. The dominant-negative *MYB16p::MYB16-SRDX* plants  
284 were strongly stained with TB as compared with WT plants (Figure 6C and 6D). In contrast, the  
285 *BASLp::MYB16-YFP* or *CYP77A6p::MYB16-VP16* line had less TB penetration (Figure 6D), which

286 suggests that the cuticular layer is thicker in MYB16 ectopic expression lines.

287 To confirm that the formation of stomatal clusters in MYB16 ectopic expression lines is due to the  
288 accumulation of cutin, we ectopically expressed CUTICLE DESTRUCTING FACTOR 1 (CDEF1), a  
289 cutinase (Takahashi et al., 2010), in epidermal cells by the *ML1* promoter in a *BASLp::MYB16-YFP* or  
290 *CYP77A6p:MYB16-VP16* background. The stomatal clusters were reduced in WT plants, and both  
291 stomatal density and clusters rescued in MYB16 ectopic expression lines (Figure 6E and F), which  
292 suggests the link between stomatal clusters and cuticle production. Stomatal density was also reduced in  
293 the *BASLp::MYB16-YFP* or *CYP77A6p:MYB16-VP16* line after introducing CDEF1, but the density was  
294 slightly increased in the WT (Figure 6E). These results suggest a crosstalk between stomatal  
295 development and cuticle accumulation. MYB16 ectopic expression increased cutin accumulation, which  
296 led to abnormal stomatal patterning.  
297



## 298 **DISCUSSION**

299       During organ morphogenesis, oriented cell division, extracellular matrix (ECM) and cell–cell  
300 signaling are all required for maintaining stem cell multipotency or transforming stem cells to  
301 differentiated cells, thereby generating a specific pattern. How the active forces such as signaling  
302 cascades and passive forces such as ECM are integrated or regulated in forming a functional tissue  
303 remains to be answered. Here, we used an *Arabidopsis* stomatal lineage to investigate the coordination of  
304 the cuticle layer and fate determiners in leaf epidermal development. By using time-lapse imaging and  
305 quantitative analysis of sequential events in lineage progression, we found that MYB16, a key regulator  
306 of cutin biosynthesis, expressed in SLGCs, a young state of epidermal cells, and was transcriptionally  
307 suppressed in meristemoids by SPCH (Figure 1). One of the functions of an epidermal cell is to produce  
308 cuticular layers for a physical barrier, so every protoderm cell in epidermis may be able to express  
309 MYB16 to turn on downstream genes for cuticle production. However, the timing of expression is  
310 important. We found that for cells in the stomatal lineage, SPCH downregulates MYB16 until the fate is  
311 determined. MYB16 appears again in symmetric division in young guard cells whose fate is specified  
312 (Figure 3). Eventually a mature stoma with thick cuticular layers is formed. Thus, the formation of  
313 cuticle is tightly controlled and integrated with lineage progression to ensure proper development of a  
314 stoma.

315       Many stem cell studies have aimed to understand ECM in determining cell fate. One way is by  
316 ECM affecting the stiffness of a tissue to specify the microenvironment and direct stem cell specification  
317 (Engler et al., 2006). In animals, mechanobiology has focused on cancer metastasis (Makale, 2007) and  
318 tissue regeneration such as hair regeneration in epidermis (Chen et al., 2015). In plants, disruption of

319 ECM reduces cell adhesion and generates disorganized tumor-like growth on shoots (Krupková et al.,  
320 2007; San-Bento et al., 2014). Unlike direct cell adhesion mediated by protein linkage and ECM in the  
321 animal system, cell adhesion in plants is mostly mediated by the deposition of a pectin-rich middle  
322 lamella between adjacent cell walls to promote the mechanical force on epidermis and coordinate the  
323 tissue-wise growth. Different from the modification of pectin between cell walls, cuticle acumination  
324 occurs mainly on top of leaf epidermis, with possibly covalent linkage between cutin and  
325 polysaccharides (Fang et al., 2001). The elevated amount of cuticle may affect overall epidermal  
326 mechanical property during leaf expansion. Cuticle production has been linked to stomatal density, but  
327 not stomatal clustering yet (Gray et al., 2000; Yang et al., 2011). Because *MYB16-crispr* and  
328 overexpression lines showed altered stomatal density (Figure 2; Supplemental Figure 2), we cannot rule  
329 out that MYB16 could modulate stomatal lineage divisions as well, although SPCH is still the major  
330 gene driving the cell division (Figure 3A to 3C). Stomatal polarity has been linked to mechanical force,  
331 with BRXL2 localization in a leaf reflecting the growth and tension direction (Bringmann and  
332 Bergmann, 2017). The ectopic deposition of cuticle in meristemoids may affect mechanical stress, thus  
333 leading to reduced and redistributed polarity complex (Figure 4) and ultimately a change in cell fate  
334 (Figure 2 and 3). A suboptimal water condition of high-percentage agar provides a strategy to  
335 manipulate mechanical force (Verger et al., 2018) and modulate polarity localization during stomatal  
336 development. The rescue of polarity and stomatal clustering under high-agar concentration suggests the  
337 disrupted tensile stress in MYB16 ectopic lines (Figure 5). Expression of a cutinase, CDEF1, in  
338 epidermis, rescued the cluster phenotypes in MYB16 ectopic lines (Figure 6). All the lines of evidence  
339 suggest that ectopic accumulation of cutin on epidermis may affect mechanical stress, which affects the

340 polarity establishment during stomatal development, thus leading to aberrant stomatal patterning. The  
341 downregulation of cutin expression in meristemoids is required for correct polarity establishment during  
342 asymmetric cell division in stomatal development (Figure 7).

343 Ectopically expressing MYB16 by using lineage-specific promoters allowed for dissecting the  
344 critical timing of MYB16 expression (Figure 3G to 3O). Of interest was the stomatal lineage-specific  
345 expression patterns of two well-known cutin biosynthesis genes, *CYP77A6* and *CYP86A4* (Figure 3E  
346 and 3F; Supplemental Figure 4). *CYP77A6* and *CYP86A4* are in the cutin biosynthesis pathway  
347 according to enzyme functions, mutant phenotypes such as inflorescence fusion and metabolite analysis  
348 (Li-Beisson et al., 2009). The mutants *gpat4* and *gpat8* affect stomatal ledge formation (Li et al., 2007),  
349 so these two enzymes might be stomatal lineage-specific as well. The finding of stomatal-specific  
350 expression patterns of *CYP77A6* and *CYP86A4* suggests that other cutin biosynthesis-related genes  
351 might be responsible for cuticle production in pavement cells.

352 The evolutionary origins of genes that specify stomatal development and function have been  
353 resolved phylogenetically in bryophytes (Harris et al., 2020). Genes related to lipid biosynthesis can be  
354 traced back to algae. However, the basic cuticle biosynthetic machinery such as *CYP77A*, *GPAT* and  
355 *MYB* started to evolve in bryophytes as well (Kong et al., 2020). These lines of evidence together with  
356 our findings of *CYP77A6* and *CYP86A4* expression patterns suggest the co-evolution of stomata and  
357 cutin machinery in specifying a stoma. One stomatal characteristic is that stomatal ledges, lips around  
358 each stomatal pore, are coated with a waterproof layer of cuticle. A mutant, *focll-1*, showed “fused”  
359 ledges and defects in aperture control and transpiration (Hunt et al., 2017). Along with genes involved in  
360 structural function, the emergence of MYB transcription factors provides a strategy for spatiotemporal

361 control of gene expression in a developmental context. In *Arabidopsis*, MYB16 and MYB106 regulate  
362 cuticle formation in reproductive organs (Oshima et al., 2013). However, MYB16 is a major regulator of  
363 cuticle production in vegetative tissues (Oshima and Mitsuda, 2013). The specific function of members  
364 in a gene family leads to the diversity of the transcriptional network in building a multicellular organism.  
365 With the stomatal lineage-specific transcriptomes and single-cell transcriptomes in epidermis (Adrian et  
366 al., 2015; Ho et al., 2021; Lopez-Anido et al., 2021), we could start to ask about  
367 developmental-regulation and cell type-specific expression of a particular set of genes in cuticle  
368 biosynthesis. Biochemical and functional analysis will further pinpoint the metabolic steps in the cuticle  
369 synthesis pathway. Modulation of cuticular layers and stomatal numbers on leaf epidermis provides a  
370 way to improve plant growth and productivity under drought conditions.

371

## 372 **METHODS**

### 373 **Plant materials, growth conditions and chemical treatments**

374 Col-0 was the wild type (WT) in all experiments and all transgenic lines were created in this accession.  
375 Plant reporters used in this study were *AtML1p::RC12A-mCherry*, *SPCHp::SPCH-CFP* (Davies and  
376 Bergmann, 2014), *CYP77A6p::MYB16-VP16*, *MYB16p::MYB16-SRDX* (Oshima et al., 2013). Details  
377 for new constructs, *MYB16p::MYB16-YFP*, *BASLp::MYB16-YFP*, MYB16 inducible system (for  
378 *iMYB16*), *CYP77A6p::MYB16-VP16-YFP*, *mini35S-MYB16p::LUC2*, *35S::SPCH-YFP*,  
379 *35S::SCRM-CFP*, *ML1p::CDEF1-flag* and *myb16-crispr* allele are in Supplemental Methods. Primers  
380 used for DNA construction are in Supplemental Table 1. Ethanol (EtOH)-sterilized seeds were sown on  
381 1/2 Murashige and Skoog (MS) medium plates and kept at 4°C for stratification. After 24 h, plates were  
382 transferred to a 22°C plant tissue culture room with 16 h light/8 h dark cycle. For  $\beta$ -estradiol treatment,  
383  $\beta$ -estradiol in absolute EtOH was added into 1/2 MS medium to the final concentration of 50  $\mu$ M. An  
384 equal volume of absolute EtOH was also added into another 1/2 MS medium as the mock control. Plant  
385 materials for phenotyping, mRNA and protein extraction were first grown on 1/2 MS plates for 6 days,  
386 then transferred to EtOH or  $\beta$ -estradiol-containing plates for an additional 4 days. Accession numbers  
387 are as follows: *MYB16* (AT5G15310), *SPCH* (AT5G53210), *BASL* (AT5G60880), *BRXL2* (AT3G14000),  
388 *CYP77A6* (AT3G10570), *CYP86A4* (AT1G01600), *LACS1* (AT2G47240), *LACS2* (AT1G49430), *GPAT4*  
389 (AT1G01610), *GPAT8* (AT4G00400) and *CDEF1* (AT4G30140).

### 390 **Microscopy**

391 For quantification of stomatal phenotypes, the seedlings were fixed in a 7:1 fixation solution of ethanol  
392 and acetic acid for 1 night. Before observation under a Leica DM2500 LED microscopy with DIC prism,

393 the seedlings were washed with MQ water and softened with 1 M KOH until they were completely  
394 transparent. The samples were mounted in MQ water for observation. Stomata were quantified from the  
395 central region of cotyledons or true leaves. For identifying fluorescence signals, live seedlings were  
396 mounted in sterilized water and observed under a Leica STELLARIS 8 (for time-lapse and whole leaf  
397 analysis) or Zeiss LSM880 (for expression pattern analysis) confocal microscope. CFP, GFP, and YFP  
398 were excited with 458, 488, 514 nm laser, respectively. Propidium iodide (PI) and mCherry were excited  
399 with 561 nm laser. PI solution was penetrated into true leaves by applying a vacuum for 30 min.

#### 400 **mRNA and protein expression**

401 For detection of mRNA expression, total RNA was extracted from plant tissue by using the RNA Plus  
402 Mini Kit (LabPrep). Complementary DNA (cDNA) was synthesized from 1 µg total RNA by using  
403 SuperScript III transcriptase (Invitrogen). After synthesis, the products were diluted with DEPC-water.  
404 The reaction solution contained cDNA template, specific primers and Power SYBR Green Master Mix  
405 (Applied Biosystems) for quantitative real-time PCR (qRT-PCR) by using the QuantStudio 12K Flex  
406 Real-Time PCR System (Applied Biosystems). The relative expression was analyzed by using  
407 QuantStudio 12K Flex software (Applied Biosystems). Primers for qRT-PCR analysis are in  
408 Supplemental Table 1.

409 For protein detection, total protein was extracted from plant tissue by using protein sample buffer  
410 (62.5 mM Tris-HCl pH 6.8, 2.5% SDS, 0.002% Bromophenol Blue, 0.7135 M β-mercaptoethanol and  
411 10% glycerol) and boiled under 100°C for 10 min. The extraction was directly used for western blot  
412 analysis with 10% SDS-PAGE. After electrophoresis and transferring, the hybridization with proper  
413 antibodies by SNAP i.d 2.0 Protein Detection System (Merck) was performed. The chemiluminescence

414 signal was detected in a darkroom by using film. The loading control was the SDS-PAGE stained with  
415 Coomassie blue.

#### 416 **Chromatin immunoprecipitation (ChIP) qRT-PCR assay**

417 To isolate SPCH-chromatin complex, 1.5 g of 4 dpg wild type (Col-0) and *SPCHp::SPCH-CFP*  
418 seedlings were harvested and vacuum infiltrated with 1% formaldehyde for 10 min. The crosslinking  
419 reaction was then stopped with 2 M glycine solution. After a series steps of homogenizing samples,  
420 nuclei isolation, lysis and DNA fragmentation (Haring et al., 2007), the protein–chromatin solution was  
421 incubated with GFP antibody-conjugated magnetic beads (ChromoTek) under 4°C overnight. After  
422 eluting and reverse crosslinking under 65°C, the final products were purified by using a PCR cleanup  
423 column (Geneaid) and eluted in 20 µL 10 mM Tris-HCl (pH 8.0). For qRT-PCR, the reaction solution  
424 contained purified products, specific primers and Power SYBR Green Master Mix (Applied Biosystems)  
425 mixed and involving the QuantStudio 12K Flex Real-Time PCR System (Applied Biosystems). *EIF4A1*  
426 was used as a negative control. The fold enrichment was calculated as follows: Ct value from IP  
427 products was divided by Ct value from input, and the ratio was normalized by setting the wild type  
428 (Col-0) to 1 on each individual detected region. Primers for qRT PCR analysis are in Supplemental  
429 Table 1.

#### 430 **Luciferase reporter assay**

431 The protoplast transient expression was analyzed by PEG-mediated transformation (Yoo et al., 2007).  
432 The reporter, *mini35S-MYB16p::LUC2*, and the effector, *35S::SPCH-YFP* and *35S::SCRM-CFP*, and  
433 naked DNA were cotransformed into mesophyll protoplasts isolated from 3-week-old wild-type (Col-0)  
434 leaves. After transformation, the protoplasts were incubated in W5 solution under 22°C with one 16 h

435 light/8 h dark cycle. The second day, protoplasts were collected and luciferase activity assay involved  
436 the Dual-Luciferase system (Promega). The relative LUC2 activity was calculated as (luminescence  
437 intensity generated by LUC2)/(luminescence intensity generated by Rluc), then values were normalized  
438 to the empty vector control, which was set to 1.

#### 439 **PrefixSpan algorithm**

440 Time-lapse images of 7-dpg seedlings were obtained by using whole-leaf tile scanning with a Leica  
441 STELLARIS 8 confocal microscope. The interval time was 8 or 16 h. Cells with serial changes of  
442 fluorescence signals and cell division events were recorded (n=156). The matrix was analyzed by using  
443 the Python package PrefixSpan, with generator mode (Pei et al., 2001). The output matrix was presented  
444 as event counts (Supplemental Figure 2).

#### 445 **Image processing**

446 For projection of PI-stained confocal images, several stacks were processed by using SurfCut in  
447 Fiji-ImageJ (Erguvan et al., 2019).

#### 448 **Toluidine blue (TB) penetration test**

449 The plants used for the TB penetration test were grown on 1/2 Murashige and Skoog (MS) medium with  
450 0.8% phyto agar (Duchefa Biochemie). An amount of 0.05% (w/v) TB in MQ water was prepared by  
451 using a 0.22- $\mu$ m PVDF filter. Seedlings were immersed with the filtered TB solution for 2 min, then the  
452 excessive dye was washed out by using MQ water. Aerial parts were then transferred into tubes  
453 containing 1 mL 80% ethanol for 2 h in the dark. The ethanol solution was measured by  
454 spectrophotometry with absorbance 430 nm for TB and 626 nm for chlorophyll.

455



456 **Supplemental Data**

457 The following materials are available in the online file.

458 **Supplemental figure 1.** The localization preference of MYB16 is in stomatal lineage ground cells  
459 (SLGCs).

460 **Supplemental figure 2.** Stomatal density is reduced in the *myb16-crispr* mutant.

461 **Supplemental figure 3.** The workflow of MYB16 and SPCH dynamics by PrefixSpan analysis.

462 **Supplemental figure 4.** Quantification of CYP77A6 and CYP86A4 transcription patterns.

463 **Supplemental figure 5.** Two types of stomatal phenotypes in *CYP77A6p::MYB16-VP16*.

464 **Supplemental figure 6.** Expression of genes related to stomatal development in ectopic MYB16  
465 lines.

466 **Supplemental figure 7.** Overexpressing EPF2 rescues stomatal clusters in *BASLp*-driven MYB16  
467 lines.

468 **Supplemental figure 8.** Cuticular-related genes are upregulated after induction in *iMYB16* lines.

469 **Supplemental Table 1.** Primers used in the study

470

471 **ACKNOWLEDGEMENTS**

472 We thank Dr. Yoshimi Oshima and Dr. Nobutaka Mitsuda (National Institute of Advanced Industrial  
473 Science and Technology, Japan) for providing *CYP77A6p::MYB16-VP16* and *MYB16p::MYB16-SRDX*  
474 lines. We thank Dr. Dominique Bergmann at Stanford University and HHMI, for providing stomata  
475 related constructs, Dr. Shu-Hsing Wu at IPMB for providing a 3-FLAG vector, and Dr. Shi-Long Tu and  
476 Ping Cheng at IPMB, Academia Sinica, for providing the gateway-compatible destination vector,  
477 pCAMBIA1390(GW) containing *35S::XVE-LexA*, for an induction system. We thank Dr. Keng-Hui Lin  
478 and Dr. Chih-Wen Yang at Institute of Physics, Academia Sinica and Dr. He-Chun Chou at Research  
479 Center for Applied Science, Academia Sinica, for surface tension consulting. We thank Mei-Jane Fang  
480 and Ming-Ling Cheng at the Genomic Technology Core Lab (IPMB, Academia Sinica) for DNA  
481 sequencing service. We thank Mei-Jane Fang and Ji-Ying Huang at the Cell Biology Core Lab (IPMB,  
482 Academia Sinica) for advice on using the Leica STELLARIS 8 and Zeiss LSM880 confocal  
483 microscopes. We thank Dr. Paul Verslues (IPMB, Academia Sinica) and Dr. Hsou-Min Li (IMB,  
484 Academia Sinica) for their suggestions on this manuscript. This work was supported by the Ministry of  
485 Science and Technology in Taiwan (MOST 108-2311-B-001-003-MY3).

486

487 **CONTRIBUTIONS OF AUTHORS**

488 S.L.Y. and C.M.K.H. designed experiments. S.L.Y., N.T. and M.Y.T. performed experiments. S.L.Y. and  
489 C.M.K.H. wrote the manuscript.

490

491

492 **REFERENCES**

- 493 Adrian, J. et al. (2015). Transcriptome dynamics of the stomatal lineage: Birth, amplification, and  
494 termination of a self-renewing population. *Dev. Cell* 33: 107–118.
- 495 Aharoni, A., Dixit, S., Jetter, R., Thoenes, E., Van Arkel, G., and Pereira, A. (2004). The SHINE clade  
496 of AP2 domain transcription factors activates wax biosynthesis, alters cuticle properties, and  
497 confers drought tolerance when overexpressed in *Arabidopsis*. *Plant Cell* 16: 2463–2480.
- 498 Baumann, K., Perez-Rodriguez, M., Bradley, D., Venail, J., Bailey, P., Jin, H., Koes, R., Roberts, K.,  
499 and Martin, C. (2007). Control of cell and petal morphogenesis by R2R3 MYB transcription factors.  
500 *Development* 134: 1691–1701.
- 501 Bessire, M., Borel, S., Fabre, G., Carrac, L., Efremova, N., Yephremov, A., Cao, Y., Jetter, R., Jacquat,  
502 A.C., Métraux, J.P., and Nawratha, C. (2011). A member of the PLEIOTROPIC DRUG  
503 RESISTANCE family of ATP binding cassette transporters is required for the formation of a  
504 functional cuticle in *Arabidopsis*. *Plant Cell* 23: 1958–1970.
- 505 Bhanot, V., Fadanavis, S.V., and Panwar, J. (2021). Revisiting the architecture, biosynthesis and  
506 functional aspects of the plant cuticle: There is more scope. *Environ. Exp. Bot.* 183: 104364.
- 507 Bird, S.M. and Gray, J.E. (2003). Signals from the cuticle affect epidermal cell differentiation. *New*  
508 *Phytol.* 157: 9–23.
- 509 Bringmann, M. and Bergmann, D.C. (2017). Tissue-wide mechanical forces influence the polarity of  
510 stomatal stem cells in *Arabidopsis*. *Curr. Biol.* 27: 877–883.
- 511 Broun, P., Poindexter, P., Osborne, E., Jiang, C.Z., and Riechmann, J.L. (2004). WIN1, a transcriptional  
512 activator of epidermal wax accumulation in *Arabidopsis*. *Proc. Natl. Acad. Sci. USA* 101: 4706–

- 513 4711.
- 514 Chen, C.C. et al. (2015). Organ-level quorum sensing directs regeneration in hair stem cell populations.  
515 Cell 161: 277–290.
- 516 Chow, C.N., Lee, T.Y., Hung, Y.C., Li, G.Z., Tseng, K.C., Liu, Y.H., Kuo, P.L., Zheng, H.Q., and  
517 Chang, W.C. (2019). PlantPAN3.0: A new and updated resource for reconstructing transcriptional  
518 regulatory networks from ChIP-seq experiments in plants. Nucleic Acids Res. 47: D1155–D1163.
- 519 Davies, K.A. and Bergmann, D.C. (2014). Functional specialization of stomatal bHLHs through  
520 modification of DNA-binding and phosphoregulation potential. Proc. Natl. Acad. Sci. USA 111:  
521 15585–15590.
- 522 Dong, J., MacAlister, C.A., and Bergmann, D.C. (2009). BASL controls asymmetric cell division in  
523 Arabidopsis. Cell 137: 1320–1330.
- 524 Engler, A.J., Sen, S., Sweeney, H.L., and Discher, D.E. (2006). Matrix elasticity directs stem cell  
525 lineage specification. Cell 126: 677–689.
- 526 Erguvan, Ö., Louveaux, M., Hamant, O., and Verger, S. (2019). ImageJ SurfCut: A user-friendly  
527 pipeline for high-throughput extraction of cell contours from 3D image stacks. BMC Biol. 17: 38.
- 528 Fang, X., Qiu, F., Yan, B., Wang, H., Mort, A.J., and Stark, R.E. (2001). NMR studies of molecular  
529 structure in fruit cuticle polyesters. Phytochemistry 57: 1035–1042.
- 530 Galletti, R., Verger, S., Hamant, O., and Ingram, G.C. (2016). Developing a ‘thick skin’: A paradoxical  
531 role for mechanical tension in maintaining epidermal integrity? Development 143: 3249–3258.
- 532 Geisler, M., Nadeau, J., and Sack, F.D. (2000). Oriented asymmetric divisions that generate the stomatal  
533 spacing pattern in Arabidopsis are disrupted by the *too many mouths* mutation. Plant Cell 12: 2075–

- 534 2086.
- 535 Gong, Y., Varnau, R., Wallner, E.S., Acharya, R., Bergmann, D.C., and Cheung, L.S. (2021).  
536 Quantitative and dynamic cell polarity tracking in plant cells. *New Phytol.* 230: 867–877.
- 537 Gray, J.E., Holroyd, G.H., Van Der Lee, F.M., Bahrami, A.R., Sijmons, P.C., Woodward, F.I., Schuch,  
538 W., and Hetherington, A.M. (2000). The HIC signalling pathway links CO<sub>2</sub> perception to stomatal  
539 development. *Nature* 408: 713–716.
- 540 Hara, K., Kajita, R., Torii, K.U., Bergmann, D.C., and Kakimoto, T. (2007). The secretory peptide gene  
541 EPF1 enforces the stomatal one-cell-spacing rule. *Genes Dev.* 21: 1720–1725.
- 542 Haring, M., Offermann, S., Danker, T., Horst, I., Peterhansel, C., and Stam, M. (2007). Chromatin  
543 immunoprecipitation: Optimization, quantitative analysis and data normalization. *Plant Methods* 3:  
544 1–16.
- 545 Harris, B.J., Harrison, C.J., Hetherington, A.M., and Williams, T.A. (2020). Phylogenomic evidence for  
546 the monophyly of Bryophytes and the reductive evolution of stomata. *Curr. Biol.* 30: 2001–2012.
- 547 Heisler, M.G., Hamant, O., Krupinski, P., Uyttewaal, M., Ohno, C., Jönsson, H., Traas, J., and  
548 Meyerowitz, E.M. (2010). Alignment between PIN1 polarity and microtubule orientation in the  
549 shoot apical meristem reveals a tight coupling between morphogenesis and auxin transport. *PLoS*  
550 *Biol.* 8: e1000516.
- 551 Ho, C.K., Bringmann, M., Oshima, Y., Mitsuda, N., and Bergmann, D.C. (2021). Transcriptional  
552 profiling reveals signatures of latent developmental potential in Arabidopsis stomatal lineage  
553 ground cells. *Proc. Natl. Acad. Sci. USA* 118: e2021682118.

- 554 Houbaert, A., Zhang, C., Tiwari, M., Wang, K., de Marcos Serrano, A., Savatin, D.V., Urs, M.J.,  
555 Zhiponova, M.K., Gudesblat, G.E., Vanhoutte, I., *et al.* (2018). POLAR-guided signalling complex  
556 assembly and localization drive asymmetric cell division. *Nature* 563, 574-578.
- 557 Houk, A.R., Jilkine, A., Mejean, C.O., Boltyanskiy, R., Dufresne, E.R., Angenent, S.B., Altschuler, S.J.,  
558 Wu, L.F., and Weiner, O.D. (2012). Membrane tension maintains cell polarity by confining signals  
559 to the leading edge during neutrophil migration. *Cell* 148: 175–188.
- 560 Hunt, L., Amsbury, S., Baillie, A., Movahedi, M., Mitchell, A., Afsharinafar, M., Swarup, K., Denyer,  
561 T., Hobbs, J.K., Swarup, R., Fleming, A.J., and Gray, J.E. (2017). Formation of the stomatal outer  
562 cuticular ledge requires a guard cell wall proline-rich protein. *Plant Physiol.* 174: 689–699.
- 563 Hunt, L. and Gray, J.E. (2009). The signaling peptide EPF2 controls asymmetric cell divisions during  
564 stomatal development. *Curr. Biol.* 19: 864–869.
- 565 Kanaoka, M.M., Pillitteri, L.J., Fujii, H., Yoshida, Y., Bogenschutz, N.L., Takabayashi, J., Zhu, J.K.,  
566 and Torii, K.U. (2008). SCREAM/ICE1 and SCREAM2 specify three cell-state transitional steps  
567 leading to Arabidopsis stomatal differentiation. *Plant Cell* 20: 1775–1785.
- 568 Kong, L., Liu, Y., Zhi, P., Wang, X., Xu, B., Gong, Z., and Chang, C. (2020). Origins and evolution of  
569 cuticle biosynthetic machinery in land plants. *Plant Physiol.* 184: 1998–2010.
- 570 Krupková, E., Immerzeel, P., Pauly, M., and Schmölling, T. (2007). The TUMOROUS SHOOT  
571 DEVELOPMENT2 gene of Arabidopsis encoding a putative methyltransferase is required for cell  
572 adhesion and co-ordinated plant development. *Plant J.* 50: 735–750.
- 573 Lampard, G.R., MacAlister, C.A., and Bergmann, D.C. (2008). Arabidopsis stomatal initiation is  
574 controlled by MAPK-mediated regulation of the bHLH SPEECHLESS. *Science* 322: 1113–1116.

- 575 Lau, O.S., Davies, K.A., Chang, J., Adrian, J., Rowe, M.H., Ballenger, C.E., and Bergmann, D.C. (2014).  
576 Direct roles of SPEECHLESS in the specification of stomatal self-renewing cells. *Science* 345:  
577 1605–1609.
- 578 Lee, J.S., Kuroha, T., Hnilova, M., Khatayevich, D., Kanaoka, M.M., McCabe, J.M., Sarikaya, M.,  
579 Tamerler, C., and Torii, K.U. (2012). Direct interaction of ligand-receptor pairs specifying stomatal  
580 patterning. *Genes Dev.* 26: 126–136.
- 581 Li-Beisson, Y., Pollard, M., Sauveplane, V., Pinot, F., Ohlrogge, J., and Beisson, F. (2009). Nanoridges  
582 that characterize the surface morphology of flowers require the synthesis of cutin polyester. *Proc.*  
583 *Natl. Acad. Sci. USA* 106: 22008–22013.
- 584 Li, Y., Beisson, F., Koo, A.J.K., Molina, I., Pollard, M., and Ohlrogge, J. (2007). Identification of  
585 acyltransferases required for cutin biosynthesis and production of cutin with suberin-like monomers.  
586 *Proc. Natl. Acad. Sci. USA* 104: 18339–18344.
- 587 Lopez-Anido, C.B., Vatén, A., Smoot, N.K., Sharma, N., Guo, V., Gong, Y., Anleu Gil, M.X., Weimer,  
588 A.K., and Bergmann, D.C. (2021). Single-cell resolution of lineage trajectories in the Arabidopsis  
589 stomatal lineage and developing leaf. *Dev. Cell* 56: 1043–1055.
- 590 Lü, S., Song, T., Kosma, D.K., Parsons, E.P., Rowland, O., and Jenks, M.A. (2009). Arabidopsis CER8  
591 encodes LONG-CHAIN ACYL-COA SYNTHETASE 1 (LACS1) that has overlapping functions  
592 with LACS2 in plant wax and cutin synthesis. *Plant J.* 59: 553–564.
- 593 MacAlister, C.A., Ohashi-Ito, K., and Bergmann, D.C. (2007). Transcription factor control of  
594 asymmetric cell divisions that establish the stomatal lineage. *Nature* 445: 537–540.
- 595 Makale, M. (2007). Cellular mechanobiology and cancer metastasis. *Birth Defects Res.* 81: 329–343.

- 596 Matas, A.J., Cobb, E.D., Bartsch, J.A., Paolillo, D.J., and Niklas, K.J. (2004). Biomechanics and  
597 anatomy of *Lycopersicon esculentum* fruit peels and enzyme-treated samples. *Am. J. Bot.* 91: 352–  
598 360.
- 599 McFarlane, H.E., Shin, J.J.H., Bird, D.A., and Samuelsen, A.L. (2010). Arabidopsis ABCG transporters,  
600 which are required for export of diverse cuticular lipids, dimerize in different combinations. *Plant*  
601 *Cell* 22: 3066–3075.
- 602 Oshima, Y. and Mitsuda, N. (2016). Enhanced cuticle accumulation by employing MIXTA-like  
603 transcription factors. *Plant Biotechnol.* 33: 161–168.
- 604 Oshima, Y. and Mitsuda, N. (2013). The MIXTA-like transcription factor MYB16 is a major regulator  
605 of cuticle formation in vegetative organs. *Plant Signal. Behav.* 8: e26826.
- 606 Oshima, Y., Shikata, M., Koyama, T., Ohtsubo, N., Mitsuda, N., and Ohme-Takagi, M. (2013).  
607 MIXTA-like transcription factors and WAX INDUCER1/SHINE1 coordinately regulate cuticle  
608 development in *Arabidopsis* and *Torenia fournieri*. *Plant Cell* 25: 1609–1624.
- 609 Pei, J., Han, J., Mortazavi-Asl, B., Pinto, H., Chen, Q., Dayal, U., and Hsu, M.C. (2001). PrefixSpan:  
610 Mining sequential patterns efficiently by prefix-projected pattern growth. *Proc. 17th Int. Conf. Data*  
611 *Eng.*
- 612 Pillitteri, L.J., Peterson, K.M., Horst, R.J., and Torii, K.U. (2011). Molecular profiling of stomatal  
613 meristemoids reveals new component of asymmetric cell division and commonalities among stem  
614 cell populations in *Arabidopsis*. *Plant Cell* 23: 3260–3275.
- 615 Rowe, M.H., Dong, J., Weimer, A.K., and Bergmann, D.C. (2019). A plant-specific polarity module  
616 establishes cell fate asymmetry in the *Arabidopsis* stomatal lineage. bioRxiv doi: 10.1101/614636.



- 617 San-Bento, R., Farcot, E., Galletti, R., Creff, A., and Ingram, G. (2014). Epidermal identity is  
618 maintained by cell-cell communication via a universally active feedback loop in *Arabidopsis*  
619 *thaliana*. *Plant J.* 77: 46–58.
- 620 Stracke, R., Werber, M., and Weisshaar, B. (2001). The R2R3-MYB gene family in *Arabidopsis*  
621 *thaliana*. *Curr. Opin. Plant Biol.* 4: 447–456.
- 622 Takahashi, K., Shimada, T., Kondo, M., Tamai, A., Mori, M., Nishimura, M., and Hara-Nishimura, I.  
623 (2010). Ectopic expression of an esterase, which is a candidate for the unidentified plant cutinase,  
624 causes cuticular defects in *Arabidopsis thaliana*. *Plant Cell Physiol.* 51: 123–131.
- 625 Tanaka, T., Tanaka, H., Machida, C., Watanabe, M., and Machida, Y. (2004). A new method for rapid  
626 visualization of defects in leaf cuticle reveals five intrinsic patterns of surface defects in  
627 *Arabidopsis*. *Plant J.* 37: 139–146.
- 628 Verger, S., Long, Y., Boudaoud, A., and Hamant, O. (2018). A tension-adhesion feedback loop in plant  
629 epidermis. *eLife* 7: 1–25.
- 630 Wang, H., Ngwenyama, N., Liu, Y., Walker, J.C., and Zhang, S. (2007). Stomatal development and  
631 patterning are regulated by environmentally responsive mitogen-activated protein kinases in  
632 *Arabidopsis*. *Plant Cell* 19: 63–73.
- 633 Yang, J., Isabel Ordiz, M., Jaworski, J.G., and Beachy, R.N. (2011). Induced accumulation of cuticular  
634 waxes enhances drought tolerance in *Arabidopsis* by changes in development of stomata. *Plant*  
635 *Physiol. Biochem.* 49: 1448–1455.
- 636 Yang, W., Pollard, M., Li-Beisson, Y., Beisson, F., Feig, M., and Ohlrogge, J. (2010). A distinct type of  
637 glycerol-3-phosphate acyltransferase with sn-2 preference and phosphatase activity producing

- 638 2-monoacylglycerol. Proc. Natl. Acad. Sci. USA 107: 12040–12045.
- 639 Yang, W., Simpson, J.P., Li-Beisson, Y., Beisson, F., Pollard, M., and Ohlrogge, J.B. (2012). A  
640 land-plant-specific glycerol-3-phosphate acyltransferase family in Arabidopsis: Substrate  
641 specificity, *sn*-2 preference, and evolution. Plant Physiol. 160: 638–652.
- 642 Yeats, T.H. and Rose, J.K.C. (2013). The formation and function of plant cuticles. Plant Physiol. 163: 5–  
643 20.
- 644 Yoo, S.D., Cho, Y.H., and Sheen, J. (2007). Arabidopsis mesophyll protoplasts: A versatile cell system  
645 for transient gene expression analysis. Nat. Protoc. 2: 1565–1572.
- 646 Zeiger, E. and Stebbins, G.L. (1972). Developmental genetics in barley: a mutant for stomatal  
647 development. Am. J. Bot. 59: 143–148.
- 648 Zhang, Y., Wang, P., Shao, W., Zhu, J.K., and Dong, J. (2015). The BASL polarity protein controls a  
649 MAPK signaling feedback loop in asymmetric cell division. Dev. Cell 33: 136–149.
- 650

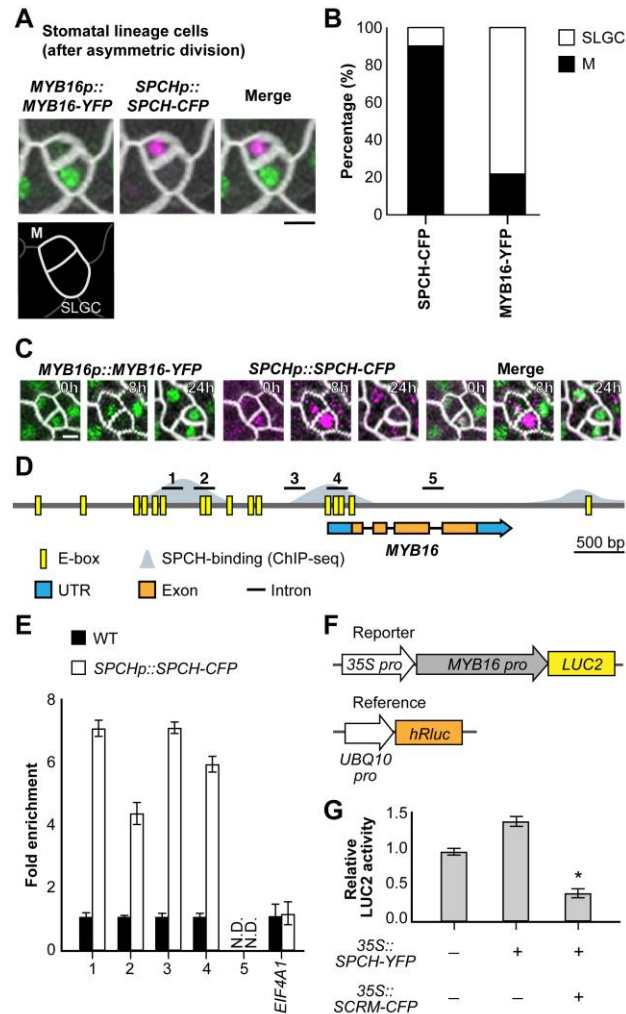

651

652 **Figure 1. SPEECHLESS (SPCH) binds to *MYB16* promoter and downregulates *MYB16* in**  
 653 **meristemoids.**

654 (A) A still image of MYB16-YFP (green) and SPCH-CFP (magenta) in a meristemoid (M)–stomatal  
 655 lineage ground cell (SLGC) pair in a 7 days post-germination (dpg) wild-type (WT) true leaf.

656 (B) Frequency of SPCH or MYB16 in either cell of meristemoid–SLGC pairs. SPCH is often found in  
 657 meristemoids as predicted (89.6%). MYB16, in contrast, is preferentially localized to SLGCs (78.4%). A  
 658 whole leaf image was used to obtain 583 pairs. M, meristemoid; SLGC, stomatal lineage ground cell.

659 (C) Time-lapse imaging of SPCH and MYB16 in a meristemoid–SLGC pair. Both SPCH and MYB16  
 660 are found in the meristemoid at 0 h but only SPCH signal remains at 8 h before asymmetric cell division  
 661 (24 h).

662 (D) Diagram of *MYB16* genome region: E-boxes (CANNTG) predicted by PlantPAN 3.0 shown in  
 663 yellow, SPCH-binding sites obtained from SPCH ChIP-seq data (Lau et al., 2014) shown in gray. Five

664 regions (black bars) designed for the ChIP-qPCR assay were used in (E).

665 (E) SPCH binds to the promoter of MYB16 as revealed by ChIP-qPCR assay of 4 dpg  
666 *SPCHp::SPCH-CFP* seedlings with GFP-trap beads. Three biological repeats showed similar results.  
667 *EIF4A1* is a negative control. N.D., not detected. Data are mean (SD).

668 (F) The experimental design for *MYB16* luciferase assay. *MYB16* promoter fused with a mini-35S  
669 promoter to enhance the expression. Ratiometric luminescent reporters were used to normalize the  
670 expression difference in a given construct.

671 (G) SPCH functions with SCRM/ICE1 to downregulate *MYB16* expression. The luciferase assay was  
672 performed in 3-week-old WT protoplasts. Four biological repeats showed similar results. \*,  $p < 0.001$ .  
673 Data are mean (SD).

674 For (A) and (C), cell outlines marked by RC12A-mCherry (gray). Scale bar, 5  $\mu\text{m}$ .

675 See also Supplemental Figure 1.

676

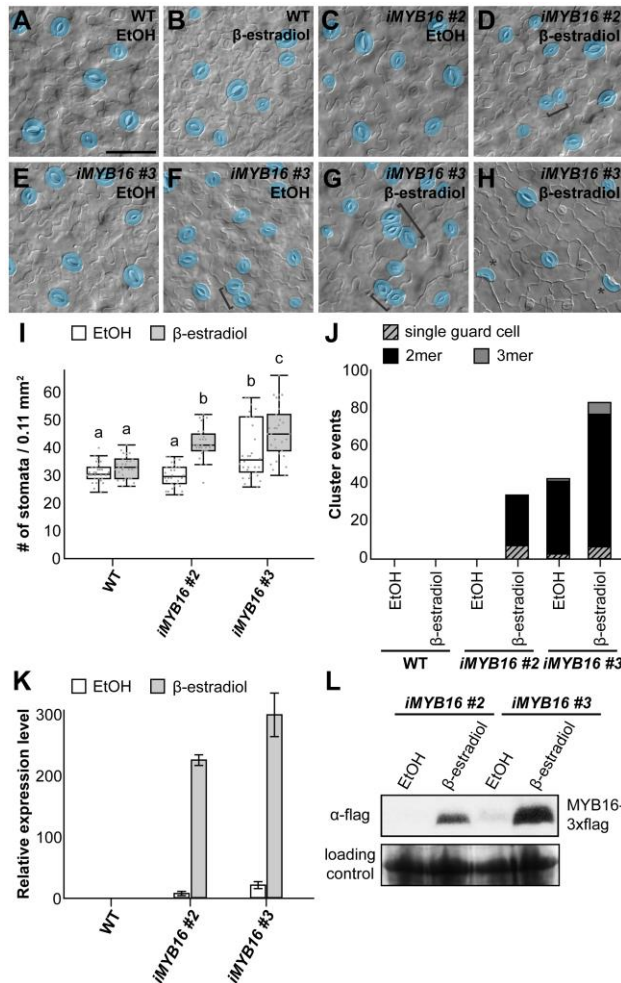

677

678 **Figure 2. Overexpression of MYB16 induces stomatal clusters.**

679 (A) to (H) DIC images of lower epidermis in 10 dpv WT true leaves and two MYB16 inducible lines  
 680 (*iMYB16#2* and #3) treated with EtOH (mock) or 50 μM β-estradiol. Stomatal pairs (brackets) are often  
 681 found after β-estradiol treatment in the inducible lines. Occasionally, single guard cells (asterisks) are  
 682 found (H). Mature guard cells are pseudo-colored in blue. Scale bar, 50 μm.

683 (I) Quantification of stomatal density from (A) to (H). Stomatal density is increased after β-estradiol  
 684 treatment in *iMYB16* lines. Compared to *iMYB16#2*, *iMYB16#3* has higher stomatal number under mock  
 685 treatment, which suggests leaky expression.  $p < 0.05$ . Kruskal-Wallis test post-hoc with  
 686 Holm-Bonferroni method. Data are median (interquartile range).

687 (J) The quantification of abnormal stomatal phenotypes showing that *iMYB16* lines after β-estradiol  
 688 treatment have more single guard cell and stomatal clusters (2-3 mer) than WT plants.

689 (K) MYB16 expression detected by qRT-PCR. The expression of MYB16 is induced more than 200  
 690 times after β-estradiol treatment. *iMYB16#3* (23.5X) has higher expression than *iMYB16#2* (7.3X) in

691 mock condition. Data are mean (SD).  
692 **(L)** Western blot analysis of MYB16 protein level. MYB16 protein level is tightly controlled in  
693 *iMYB16#2*. *iMYB16#3* has leaky MYB16 expression in the mock condition, which could explain the  
694 phenotypes observed in **(F)**, **(I)** and **(J)**. Coomassie blue staining of total protein is a loading control.  
695 A total of 30 lower epidermis samples were observed in **(I)** and **(J)**.  
696 See also Supplemental Figure 2.

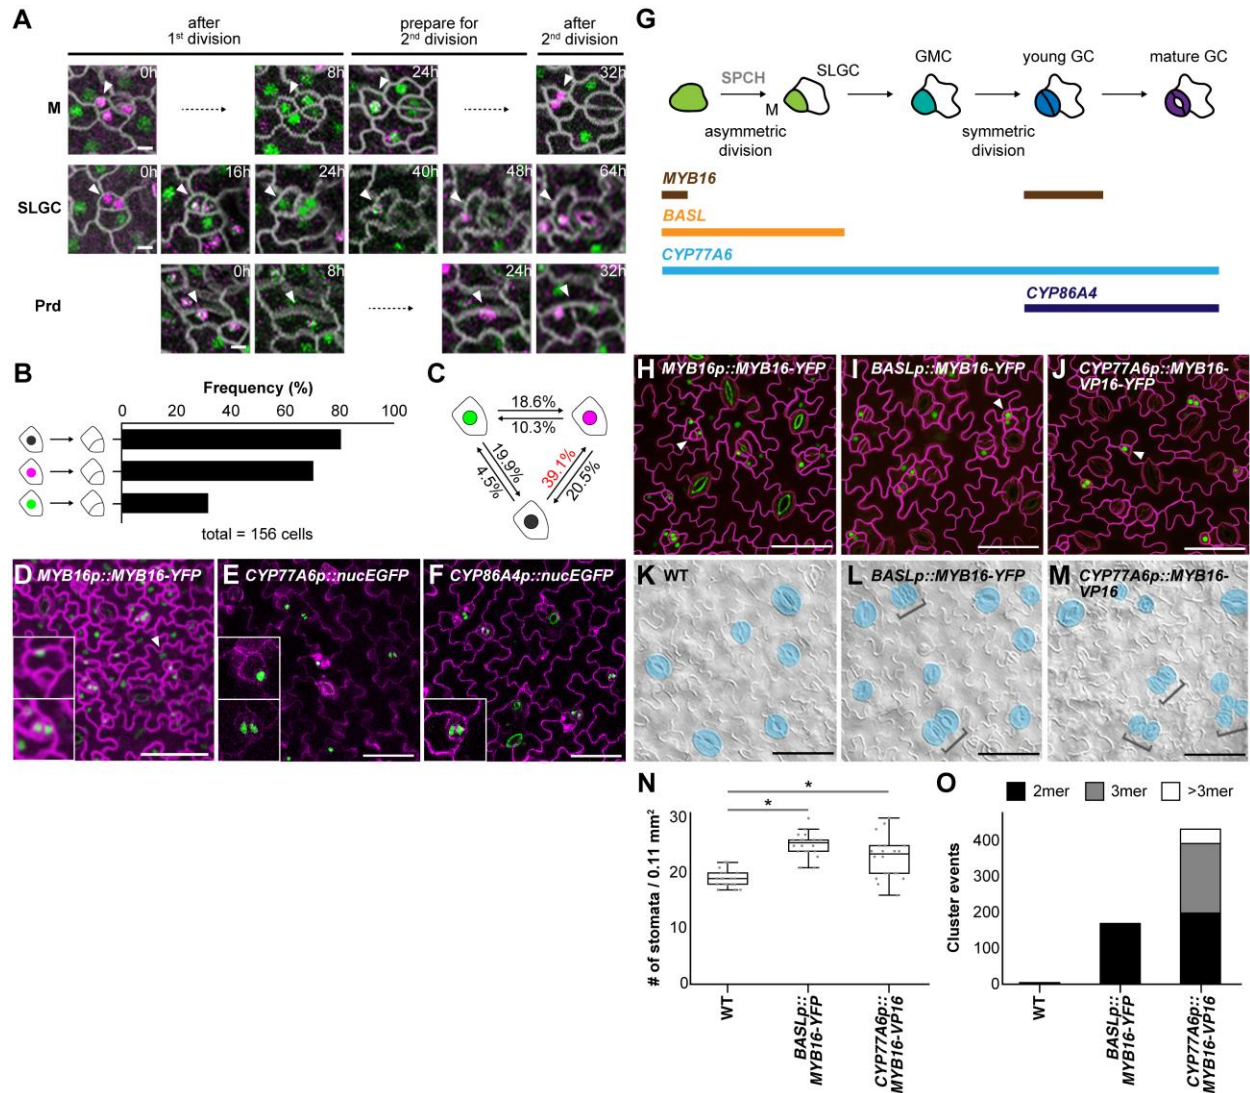

697

698 **Figure 3. Ectopic expression of MYB16 in early stomatal lineage causes stomatal clusters**

699 (A) Time-lapse confocal images of MYB16-GFP (green) and SPCH-CFP (magenta) in 7 dpv true leaves  
 700 showing that SPCH or MYB16 could express individually or together depending on the sequence of cell  
 701 division. Arrowheads in different rows indicate cells of interest, in which co-expression of MYB16 and  
 702 SPCH or SPCH alone is observed before asymmetric cell division and only SPCH remains after the  
 703 division. Time stamps indicate time since start of the first cell division. M, meristemoid; SLGC, stomatal  
 704 lineage ground cell; Prd, protoderm.

705 (B) Results from the sequential pattern analysis of protein expression using the PrefixSpan algorithm.  
 706 The colocalization (black) and SPCH alone (magenta) are more frequently seen than is MYB16 alone  
 707 (green) before cell division. A total of 156 serial events were collected from time-lapse confocal images  
 708 of 7 dpv true leaves for quantification.

709 (C) Frequency of SPCH or MYB16 expression before and after cell division using the PrefixSpan  
710 algorithm. The colocalization (black) to SPCH alone (magenta) had the highest frequency (39.1%).  
711 (D) *MYB16-YFP* driven by the *MYB16* promoter in an 8-dpg true leaf. Confocal images showing  
712 MYB16 expression is limited in SLGCs (upper inset), young guard cells (GCs, lower inset) and  
713 pavement cells (arrowhead).  
714 (E) Confocal image of *CYP77A6* transcriptional reporter in 4-dpg cotyledon showing *CYP77A6*  
715 expression is stomatal lineage-specific as seen in meristemoid (upper inset) and young guard cells (low  
716 inset).  
717 (F) Confocal image of *CYP86A4* transcriptional reporter in 4-dpg cotyledon showing *CYP86A4*  
718 expression is guard cell-specific as seen in young guard cells (inset).  
719 (G) Summarized expression window of *MYB16*, *BASL*, *CYP77A6* and *CYP86A4* promoters. M,  
720 meristemoid; SLGC, stomatal lineage ground cell; GMC, guard mother cell; GC, guard cell.  
721 (H) to (J) Confocal images of 10-dpg true leaves. *MYB16-YFP* is driven by *MYB16* (H), *BASL* (I) or  
722 *CYP77A6* (J) promoter. Compared to SLGC-localized leaves (H), *BASL* and *CYP77A6* promoter-driven  
723 *MYB16* (I) and (J) are seen in meristemoid cells (arrowheads).  
724 (K) to (M) DIC images of lower epidermis from 10 dpg true leaves of WT (K), *BASLp::MYB16-YFP* (L)  
725 and *CYP77A6p::MYB16-VP16* (M) lines. Stomatal clusters (brackets) are found in *BASLp* and  
726 *CYP77A6p* lines. Mature guard cells are pseudo-colored in blue.  
727 (N) Quantification of stomatal density showing increased density when MYB16 is ectopically expressed  
728 in stomatal lineage. A total of 20 lower-epidermis samples observed. \*,  $p < 0.05$ , by Wilcoxon  
729 signed-rank test. Data are median (interquartile range).  
730 (O) Total cluster events showing ectopically expressing MYB16 in stomatal lineage causes stomatal  
731 clusters. The value obtained from the sum of the events in a total of 20 lower-epidermis samples.  
732 Cell outlines marked by *ML1p::RC12A-mCherry* in (A), (D) and (H) to (J) (grey in [A], magenta in [D]  
733 and [H] to [J]) and stained by propidium iodide in (E) and (F). Scale bars, 5  $\mu\text{m}$  in (A) and 50  $\mu\text{m}$  in (D)  
734 to (F) and (H) to (M).  
735 See also Supplemental Figure 3 to 6.

736



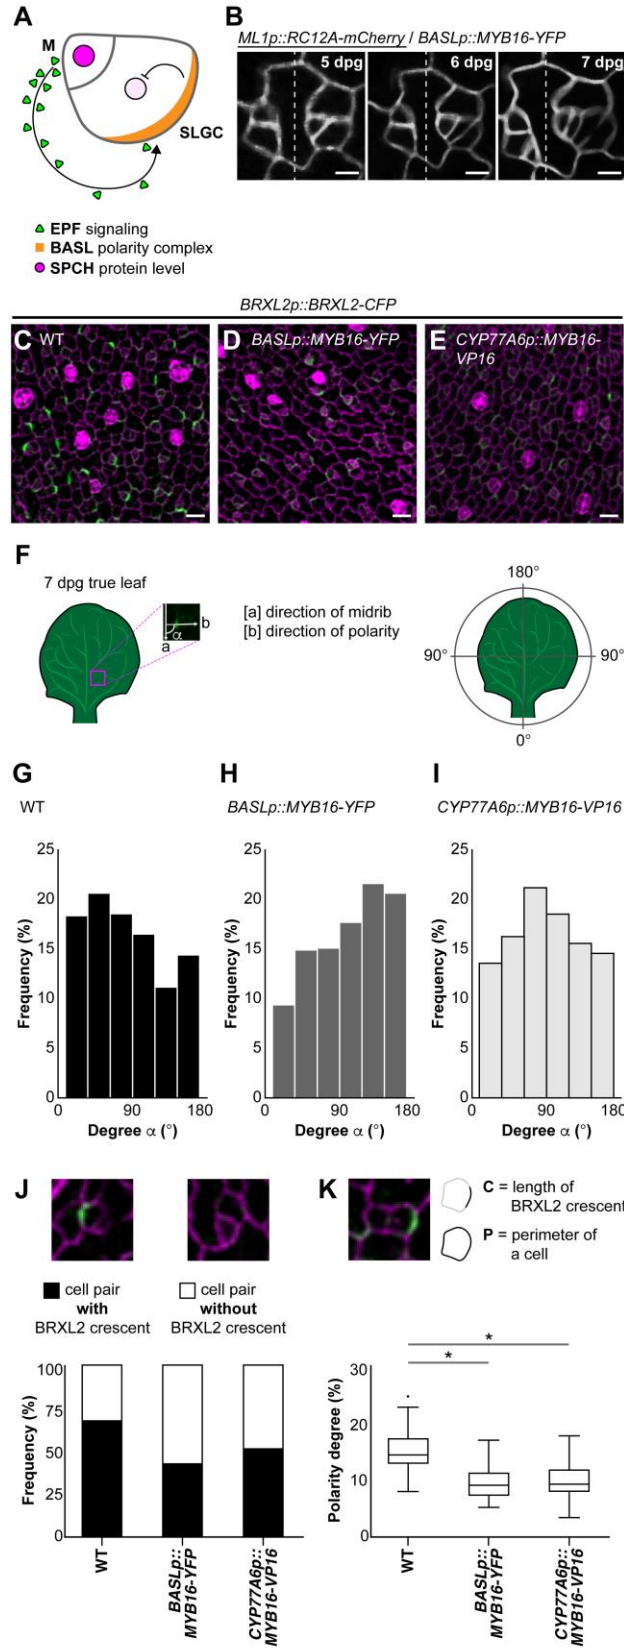

738 **Figure 4. Stomatal clusters are caused by the mis-localization and reduction of polar protein in**  
739 **stomatal lineage.**

740 (A) Diagram showing the EPIDERMAL PATTERNING FACTOR (EPF)-mediated inhibitory pathway  
741 incorporating the spatially labeled polarity complex to prevent stomatal clusters in *Arabidopsis*. EPFs  
742 are secreted from meristemoid (M) cells and activate the inhibitory signaling in SLGCs, where the  
743 polarity complex recruits inhibitory components, leading to decreased SPCH level.

744 (B) Time-lapse confocal images showing stomatal cluster formation in the *BASL* promoter-driven  
745 MYB16 ectopic line. Left parts of the images indicate normal stomatal formation. Right parts show the  
746 adjacent stoma is derived from an SLGC, resulting in stomatal clustering.

747 (C) to (E) Confocal images of the polarity marker BRXL2 in 7 dpv true leaves. Compared to WT (C),  
748 BRXL2-CFP signal (green) is dimmer in *BASLp::MYB16-YFP* (D) and *CYP77A6p::MYB16-VP16* (E).

749 (F) Angle  $\alpha$  presents the angle between the orientation of midrib and BRXL2. The orientation toward  
750 the proximal part of 7 dpv true leaves is set to 0°.

751 (G) to (I) The orientation of polarity in WT (G), *BASLp::MYB16-YFP* (H) and  
752 *CYP77A6p::MYB16-VP16* (I). To avoid propidium iodide effect, data were quantified from confocal  
753 images of 7 dpv true leaves expressing BRXL2 in the indicated lines without propidium iodide staining.  
754  $n = 769, 324$  and  $615$  in (G) to (I), respectively.

755 (J) The presence of BRXL2 in meristemoid–SLGC pairs showing that more cells in WT have BRXL2  
756 crescents.  $n = 227, 150$  and  $217$  are total cells analyzed in the corresponding order in (J).

757 (K) The polarity degree of BRXL2 crescent showing that the WT has the higher polarity degree  
758 compared to MYB16 ectopic lines. Polarity degree (C/P) is calculated from crescent length divided by  
759 cell perimeter. The dataset is derived from 67 cells with peripheral BRXL2 for each line. The dot shows  
760 the Tukey outlier. \*,  $p < 0.001$ , by student t-test. Data are median (interquartile range).

761 Cell outline marked by *ML1p:RC12A-mCherry* in (B) and labelled by propidium iodide in (C) to (E), (J)  
762 and (K). Scale bars, 5  $\mu\text{m}$  in (B) and 50  $\mu\text{m}$  in (C) to (E).

763 See also Supplemental Figure 7.

764

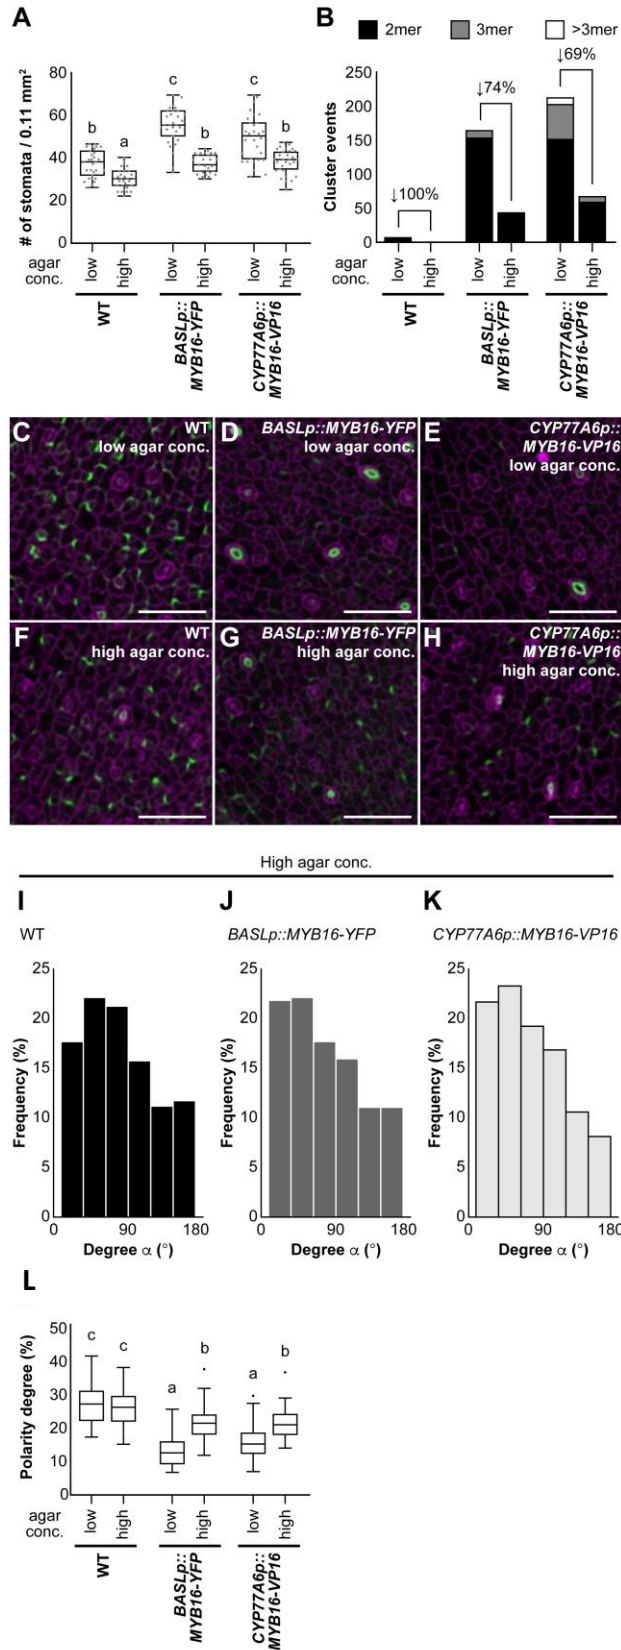

766 **Figure 5. Stomatal phenotype in MYB16 ectopic expression lines was rescued by high-percentage**  
767 **agar treatment.**

768 (A) Quantification of stomatal density showing the rescue of MYB16 ectopic expression lines by  
769 high-percentage agar treatment. Low, 1% agar as normal condition, and high, 2.5% agar. A total of 30  
770 lower-epidermis samples in each 10 dpv plants were observed. Kruskal-Wallis test post-hoc with  
771 Holm-Bonferroni method,  $p < 0.01$ . Data are median (interquartile range).

772 (B) Stomatal clusters are reduced after high-percentage agar treatment. The rescue percentage was  
773 calculated by using the difference of cluster events between two kinds of agar treatments divided by the  
774 number of cluster events in low-percentage agar treatment.

775 (C) to (H) Confocal images of the polarity marker BRXL2 in 7-dpv true leaves with two different  
776 concentrations of agar treatment. BRXL2-CFP signal (green) is similar in WT (C) and (F) but stronger  
777 in *BASLp::MYB16-YFP* (D) and (G) and *CYP77A6p::MYB16-VP16* (E) and (H) after high-percentage  
778 agar treatment.

779 (I) to (K) The orientation of polarity is rescued in *BASLp::MYB16-YFP* and *CYP77A6p::MYB16-VP16*  
780 after high-percentage agar treatment. The data were quantified from confocal images of 7-dpv true  
781 leaves expressing BRXL2 without propidium iodide staining.  $n = 587, 369, 321$  in (F) to (H),  
782 respectively.

783 (L) The rescue of the BRXL2 crescent size in MYB16 ectopic expression lines by high-percentage agar  
784 treatment. The calculated method is the same as in Figure 4K. 60 cells with peripheral BRXL2 of each  
785 line under each treatment were collected. The dot shows the Tukey outlier.  $p < 0.001$ , by two-way  
786 ANOVA with Tukey post-hoc test. Data are median (interquartile range).

787 For (C) to (H), cell outline is labelled by propidium iodide. Scale bars, 50  $\mu\text{m}$  in (C) to (H).

788

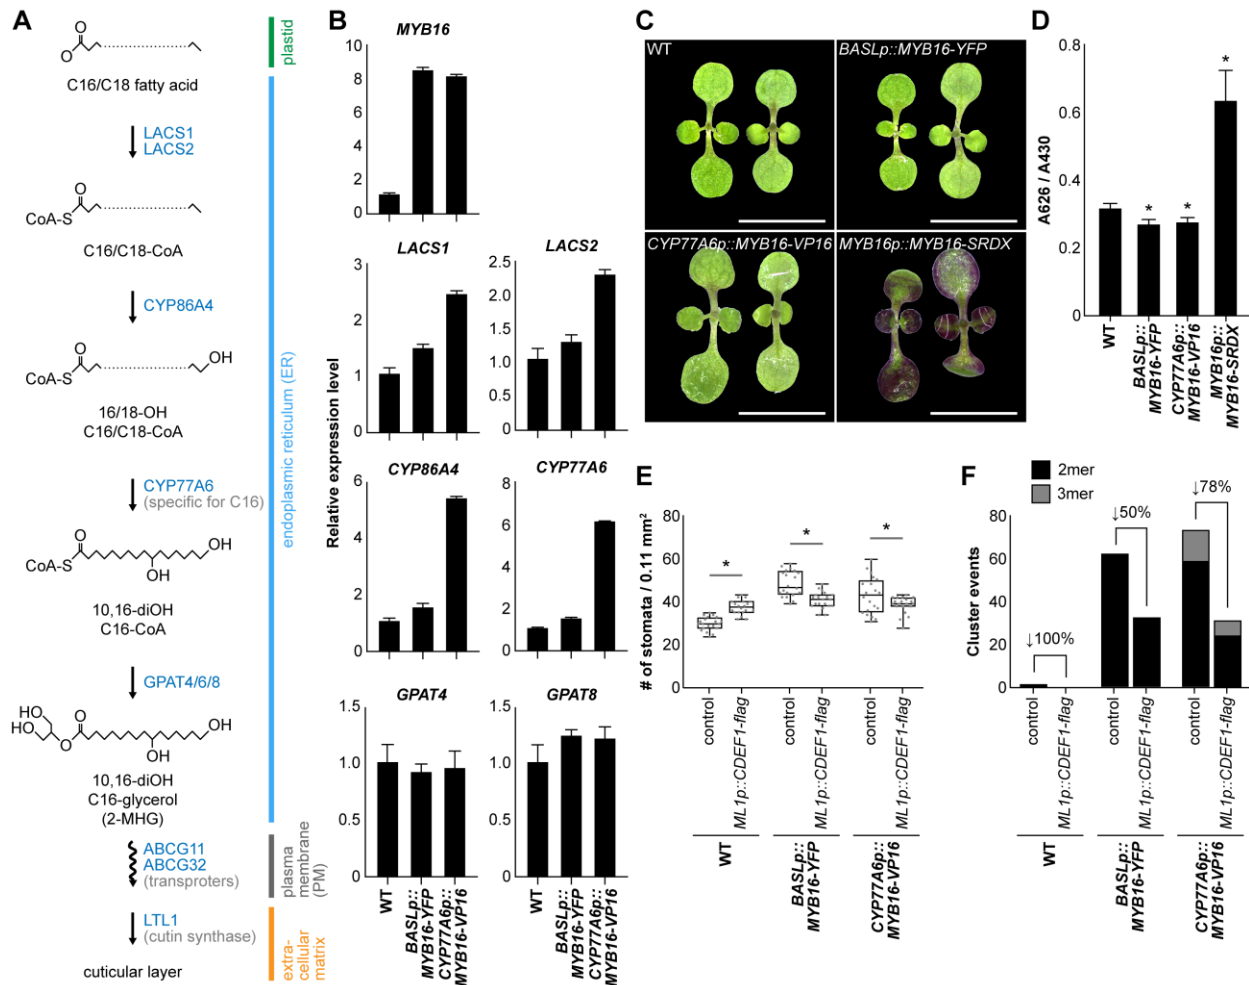

789

790 **Figure 6. The stomatal clusters in MYB16 ectopic lines are reduced by expression of a cutinase,**  
 791 **CDEF1.**

792 (A) The biosynthesis pathway of the cuticular layer. The C16/C18 fatty acid from plastids is transformed  
 793 into the acyl-CoA intermediate by LACS1 and LACS2. The hydroxylation of acyl-CoA intermediate is  
 794 catalyzed by CYP86A4, CYP77A6 and GPAT4/6/8 sequentially to produce the monomer for cuticular  
 795 layer synthesis. CYP86A4 and GPAT4/6/8 can catalyze both C16 and C18 intermediates, but CYP77A6  
 796 preferentially uses C16 as a substrate (Li-Beisson et al., 2009). The transportation of the monomers by  
 797 ABCG11 and ABCG32 transporters supplies the material required for the polymerization of the cuticular  
 798 layer outside cell walls. LACS1/2, LONG CHAIN ACYL-COA SYNTHETASE 1/2; GPAT4/6/8,  
 799 GLYCEROL-3-PHOSPHATE SN-2-ACYLTRANSFERASE 4/6/8.

800 (B) Relative mRNA expression of cuticle biosynthesis genes in MYB16 ectopic lines. 7 dpv WT is used  
 801 as a reference. Data are mean (SD).

802 (C) Toluidine blue (TB) test on 7 dpg seedlings of WT, *BASLp::MYB16-YFP*, *CYP77A6p::MYB16-VP16*  
803 and *MYB16p::MYB16-SRDX*. Scale bars, 0.5 cm.

804 (D) Quantification of penetrated TB showing *MYB16-SRDX* plants are most permeable and *BASLp* or  
805 *CYP77A6p* lines are less permeable than WT seedlings. The TB absorbance (A626) is normalized by  
806 chlorophyll absorbance (A430). \*,  $p < 0.001$ , by student t-test.

807 (E) Quantification of stomatal density showing the partial rescue of MYB16 ectopic expression lines by  
808 ectopically expressing cutinase CDEF1. A total of 20 lower epidermis samples in each 10 dpg plants  
809 were observed. \*,  $p < 0.05$ , by Wilcoxon signed-rank test. Data are median (interquartile range).

810 (F) The stomatal clusters are reduced after ectopically expressing cutinase CDEF1. The rescue  
811 percentage is the difference of the cluster event between control and *ML1p::CDEF1-flag* divided by the  
812 event number in control.

813 See also Supplemental Figure 8.

814

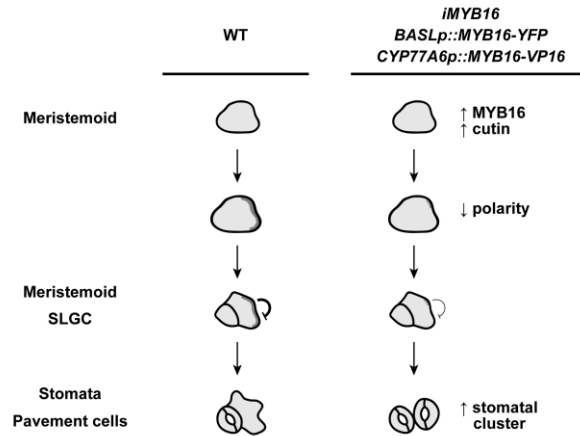

815

816 **Figure 7. Ectopic MYB16 expression in meristemoids leads to stomatal clusters by modulating**  
817 **polarity protein behavior during asymmetric cell division.**

818 In WT epidermis, meristemoids restrict MYB16 expression to ensure polarity establishment for proper  
819 stomatal patterning. However, in MYB16 overexpression and ectopic expression lines, high MYB16  
820 expression in meristemoids causes cuticle accumulation. The incorrect timing of cuticle formation may  
821 affect the mechanical property in cells, which further causes mis-polarization and reduction of polarity  
822 protein during asymmetric cell division. The dark grey shading represents the polarity degree.

823

## Parsed Citations

**Adrian, J. et al. (2015).** Transcriptome dynamics of the stomatal lineage: Birth, amplification, and termination of a self-renewing population. *Dev. Cell* 33: 107–118.

Google Scholar: [Author Only](#) [Title Only](#) [Author and Title](#)

**Aharoni, A., Dixit, S., Jetter, R., Thoenes, E., Van Arkel, G., and Pereira, A (2004).** The SHINE clade of AP2 domain transcription factors activates wax biosynthesis, alters cuticle properties, and confers drought tolerance when overexpressed in *Arabidopsis*. *Plant Cell* 16: 2463–2480.

Google Scholar: [Author Only](#) [Title Only](#) [Author and Title](#)

**Baumann, K., Perez-Rodriguez, M., Bradley, D., Venail, J., Bailey, P., Jin, H., Koes, R., Roberts, K., and Martin, C. (2007).** Control of cell and petal morphogenesis by R2R3 MYB transcription factors. *Development* 134: 1691–1701.

Google Scholar: [Author Only](#) [Title Only](#) [Author and Title](#)

**Bessire, M., Borel, S., Fabre, G., Carrac, L., Efremova, N., Yephremov, A., Cao, Y., Jetter, R., Jacquat, A.C., Métraux, J.P., and Nawratha, C. (2011).** A member of the PLEIOTROPIC DRUG RESISTANCE family of ATP binding cassette transporters is required for the formation of a functional cuticle in *Arabidopsis*. *Plant Cell* 23: 1958–1970.

Google Scholar: [Author Only](#) [Title Only](#) [Author and Title](#)

**Bhanot, V., Fadanavis, S.V., and Panwar, J. (2021).** Revisiting the architecture, biosynthesis and functional aspects of the plant cuticle: There is more scope. *Environ. Exp. Bot.* 183: 104364.

Google Scholar: [Author Only](#) [Title Only](#) [Author and Title](#)

**Bird, S.M. and Gray, J.E. (2003).** Signals from the cuticle affect epidermal cell differentiation. *New Phytol.* 157: 9–23.

Google Scholar: [Author Only](#) [Title Only](#) [Author and Title](#)

**Bringmann, M. and Bergmann, D.C. (2017).** Tissue-wide mechanical forces influence the polarity of stomatal stem cells in *Arabidopsis*. *Curr. Biol.* 27: 877–883.

Google Scholar: [Author Only](#) [Title Only](#) [Author and Title](#)

**Broun, P., Poindexter, P., Osborne, E., Jiang, C.Z., and Riechmann, J.L. (2004).** WN1, a transcriptional activator of epidermal wax accumulation in *Arabidopsis*. *Proc. Natl. Acad. Sci. USA* 101: 4706–4711.

Google Scholar: [Author Only](#) [Title Only](#) [Author and Title](#)

**Chen, C.C. et al. (2015).** Organ-level quorum sensing directs regeneration in hair stem cell populations. *Cell* 161: 277–290.

Google Scholar: [Author Only](#) [Title Only](#) [Author and Title](#)

**Chow, C.N., Lee, T.Y., Hung, Y.C., Li, G.Z., Tseng, K.C., Liu, Y.H., Kuo, P.L., Zheng, H.Q., and Chang, W.C. (2019).** PlantPAN3.0: A new and updated resource for reconstructing transcriptional regulatory networks from ChIP-seq experiments in plants. *Nucleic Acids Res.* 47: D1155–D1163.

Google Scholar: [Author Only](#) [Title Only](#) [Author and Title](#)

**Davies, K.A. and Bergmann, D.C. (2014).** Functional specialization of stomatal bHLHs through modification of DNA-binding and phosphoregulation potential. *Proc. Natl. Acad. Sci. USA* 111: 15585–15590.

Google Scholar: [Author Only](#) [Title Only](#) [Author and Title](#)

**Dong, J., MacAlister, C.A., and Bergmann, D.C. (2009).** BASL controls asymmetric cell division in *Arabidopsis*. *Cell* 137: 1320–1330.

Google Scholar: [Author Only](#) [Title Only](#) [Author and Title](#)

**Engler, A.J., Sen, S., Sweeney, H.L., and Discher, D.E. (2006).** Matrix elasticity directs stem cell lineage specification. *Cell* 126: 677–689.

Google Scholar: [Author Only](#) [Title Only](#) [Author and Title](#)

**Erguvan, Ö., Louveaux, M., Hamant, O., and Verger, S. (2019).** ImageJ SurfCut: A user-friendly pipeline for high-throughput extraction of cell contours from 3D image stacks. *BMC Biol.* 17: 38.

Google Scholar: [Author Only](#) [Title Only](#) [Author and Title](#)

**Fang, X., Qiu, F., Yan, B., Wang, H., Mort, A.J., and Stark, R.E. (2001).** NMR studies of molecular structure in fruit cuticle polyesters. *Phytochemistry* 57: 1035–1042.

Google Scholar: [Author Only](#) [Title Only](#) [Author and Title](#)

**Galletti, R., Verger, S., Hamant, O., and Ingram, G.C. (2016).** Developing a 'thick skin': A paradoxical role for mechanical tension in maintaining epidermal integrity? *Development* 143: 3249–3258.

Google Scholar: [Author Only](#) [Title Only](#) [Author and Title](#)

**Geisler, M., Nadeau, J., and Sack, F.D. (2000).** Oriented asymmetric divisions that generate the stomatal spacing pattern in *Arabidopsis* are disrupted by the too many mouths mutation. *Plant Cell* 12: 2075–2086.

Google Scholar: [Author Only](#) [Title Only](#) [Author and Title](#)

**Gong, Y., Varnau, R., Wallner, E.S., Acharya, R., Bergmann, D.C., and Cheung, L.S. (2021).** Quantitative and dynamic cell polarity tracking in plant cells. *New Phytol.* 230: 867–877.

Google Scholar: [Author Only](#) [Title Only](#) [Author and Title](#)



Gray, J.E., Holroyd, G.H., Van Der Lee, F.M., Bahrami, A.R., Sijmons, P.C., Woodward, F.I., Schuch, W., and Hetherington, A.M. (2000). The HIC signalling pathway links CO<sub>2</sub> perception to stomatal development. *Nature* 408: 713–716.

Google Scholar: [Author Only Title Only Author and Title](#)

Hara, K., Kajita, R., Torii, K.U., Bergmann, D.C., and Kakimoto, T. (2007). The secretory peptide gene EPF1 enforces the stomatal one-cell-spacing rule. *Genes Dev.* 21: 1720–1725.

Google Scholar: [Author Only Title Only Author and Title](#)

Haring, M., Offermann, S., Danker, T., Horst, I., Peterhansel, C., and Stam, M. (2007). Chromatin immunoprecipitation: Optimization, quantitative analysis and data normalization. *Plant Methods* 3: 1–16.

Google Scholar: [Author Only Title Only Author and Title](#)

Harris, B.J., Harrison, C.J., Hetherington, A.M., and Williams, T.A. (2020). Phylogenomic evidence for the monophyly of Bryophytes and the reductive evolution of stomata. *Curr. Biol.* 30: 2001–2012.

Google Scholar: [Author Only Title Only Author and Title](#)

Heisler, M.G., Hamant, O., Krupinski, P., Uyttewaal, M., Ohno, C., Jönsson, H., Traas, J., and Meyerowitz, E.M. (2010). Alignment between PIN1 polarity and microtubule orientation in the shoot apical meristem reveals a tight coupling between morphogenesis and auxin transport. *PLoS Biol.* 8: e1000516.

Google Scholar: [Author Only Title Only Author and Title](#)

Ho, C.K., Bringmann, M., Oshima, Y., Mitsuda, N., and Bergmann, D.C. (2021). Transcriptional profiling reveals signatures of latent developmental potential in *Arabidopsis* stomatal lineage ground cells. *Proc. Natl. Acad. Sci. USA* 118: e2021682118.

Google Scholar: [Author Only Title Only Author and Title](#)

Houbaert, A., Zhang, C., Tiwari, M., Wang, K., de Marcos Serrano, A., Savatin, D.V., Urs, M.J., Zhiponova, M.K., Gudesblat, G.E., Vanhoutte, I., et al. (2018). POLAR-guided signalling complex assembly and localization drive asymmetric cell division. *Nature* 563, 574–578.

Google Scholar: [Author Only Title Only Author and Title](#)

Houk, A.R., Jilkine, A., Mejean, C.O., Boltyanskiy, R., Dufresne, E.R., Angenent, S.B., Altschuler, S.J., Wu, L.F., and Weiner, O.D. (2012). Membrane tension maintains cell polarity by confining signals to the leading edge during neutrophil migration. *Cell* 148: 175–188.

Google Scholar: [Author Only Title Only Author and Title](#)

Hunt, L., Amsbury, S., Baillie, A., Movahedi, M., Mitchell, A., Afsharinafar, M., Swarup, K., Denyer, T., Hobbs, J.K., Swarup, R., Fleming, A.J., and Gray, J.E. (2017). Formation of the stomatal outer cuticular ledge requires a guard cell wall proline-rich protein. *Plant Physiol.* 174: 689–699.

Google Scholar: [Author Only Title Only Author and Title](#)

Hunt, L. and Gray, J.E. (2009). The signaling peptide EPF2 controls asymmetric cell divisions during stomatal development. *Curr. Biol.* 19: 864–869.

Google Scholar: [Author Only Title Only Author and Title](#)

Kanaoka, M.M., Pillitteri, L.J., Fujii, H., Yoshida, Y., Bogenschutz, N.L., Takabayashi, J., Zhu, J.K., and Torii, K.U. (2008). SCREAM/ICE1 and SCREAM2 specify three cell-state transitional steps leading to *Arabidopsis* stomatal differentiation. *Plant Cell* 20: 1775–1785.

Google Scholar: [Author Only Title Only Author and Title](#)

Kong, L., Liu, Y., Zhi, P., Wang, X., Xu, B., Gong, Z., and Chang, C. (2020). Origins and evolution of cuticle biosynthetic machinery in land plants. *Plant Physiol.* 184: 1998–2010.

Google Scholar: [Author Only Title Only Author and Title](#)

Krupková, E., Immerzeel, P., Pauly, M., and Schmölling, T. (2007). The TUMOROUS SHOOT DEVELOPMENT2 gene of *Arabidopsis* encoding a putative methyltransferase is required for cell adhesion and co-ordinated plant development. *Plant J.* 50: 735–750.

Google Scholar: [Author Only Title Only Author and Title](#)

Lampard, G.R., MacAlister, C.A., and Bergmann, D.C. (2008). *Arabidopsis* stomatal initiation is controlled by MAPK-mediated regulation of the bHLH SPEECHLESS. *Science* 322: 1113–1116.

Google Scholar: [Author Only Title Only Author and Title](#)

Lau, O.S., Davies, K.A., Chang, J., Adrian, J., Rowe, M.H., Ballenger, C.E., and Bergmann, D.C. (2014). Direct roles of SPEECHLESS in the specification of stomatal self-renewing cells. *Science* 345: 1605–1609.

Google Scholar: [Author Only Title Only Author and Title](#)

Lee, J.S., Kuroha, T., Hnilova, M., Khatayevich, D., Kanaoka, M.M., Mcabee, J.M., Sarikaya, M., Tamerler, C., and Torii, K.U. (2012). Direct interaction of ligand-receptor pairs specifying stomatal patterning. *Genes Dev.* 26: 126–136.

Google Scholar: [Author Only Title Only Author and Title](#)

Li-Beisson, Y., Pollard, M., Sauveplane, V., Pinot, F., Ohlrogge, J., and Beisson, F. (2009). Nanoridges that characterize the surface morphology of flowers require the synthesis of cutin polyester. *Proc. Natl. Acad. Sci. USA* 106: 22008–22013.

Google Scholar: [Author Only Title Only Author and Title](#)

Li, Y., Beisson, F., Koo, A.J.K., Molina, I., Pollard, M., and Ohlrogge, J. (2007). Identification of acyltransferases required for cutin biosynthesis and production of cutin with suberin-like monomers. *Proc. Natl. Acad. Sci. USA* 104: 18339–18344.

Google Scholar: [Author Only](#) [Title Only](#) [Author and Title](#)

**Lopez-Anido, C.B., Vatén, A., Smoot, N.K., Sharma, N., Guo, V., Gong, Y., Anleu Gil, M.X., Weimer, A.K., and Bergmann, D.C. (2021). Single-cell resolution of lineage trajectories in the Arabidopsis stomatal lineage and developing leaf. Dev. Cell 56: 1043–1055.**

Google Scholar: [Author Only](#) [Title Only](#) [Author and Title](#)

**Lü, S., Song, T., Kosma, D.K., Parsons, E.P., Rowland, O., and Jenks, M.A. (2009). Arabidopsis CER8 encodes LONG-CHAIN ACYL-COA SYNTHETASE 1 (LACS1) that has overlapping functions with LACS2 in plant wax and cutin synthesis. Plant J. 59: 553–564.**

Google Scholar: [Author Only](#) [Title Only](#) [Author and Title](#)

**MacAlister, C.A, Ohashi-Ito, K., and Bergmann, D.C. (2007). Transcription factor control of asymmetric cell divisions that establish the stomatal lineage. Nature 445: 537–540.**

Google Scholar: [Author Only](#) [Title Only](#) [Author and Title](#)

**Makale, M. (2007). Cellular mechanobiology and cancer metastasis. Birth Defects Res. 81: 329–343.**

Google Scholar: [Author Only](#) [Title Only](#) [Author and Title](#)

**Matas, A.J., Cobb, E.D., Bartsch, J.A., Paolillo, D.J., and Niklas, K.J. (2004). Biomechanics and anatomy of Lycopersicon esculentum fruit peels and enzyme-treated samples. Am. J. Bot. 91: 352–360.**

Google Scholar: [Author Only](#) [Title Only](#) [Author and Title](#)

**McFarlane, H.E., Shin, J.J.H., Bird, D.A., and Samuels, A.L. (2010). Arabidopsis ABCG transporters, which are required for export of diverse cuticular lipids, dimerize in different combinations. Plant Cell 22: 3066–3075.**

Google Scholar: [Author Only](#) [Title Only](#) [Author and Title](#)

**Oshima, Y. and Mitsuda, N. (2016). Enhanced cuticle accumulation by employing MIXTA-like transcription factors. Plant Biotechnol. 33: 161–168.**

Google Scholar: [Author Only](#) [Title Only](#) [Author and Title](#)

**Oshima, Y. and Mitsuda, N. (2013). The MIXTA-like transcription factor MYB16 is a major regulator of cuticle formation in vegetative organs. Plant Signal. Behav. 8: e26826.**

Google Scholar: [Author Only](#) [Title Only](#) [Author and Title](#)

**Oshima, Y., Shikata, M., Koyama, T., Ohtsubo, N., Mitsuda, N., and Ohme-Takagi, M. (2013). MIXTA-like transcription factors and WAX INDUCER1/SHINE1 coordinately regulate cuticle development in Arabidopsis and Torenia fournieri. Plant Cell 25: 1609–1624.**

Google Scholar: [Author Only](#) [Title Only](#) [Author and Title](#)

**Pei, J., Han, J., Mortazavi-Asl, B., Pinto, H., Chen, Q., Dayal, U., and Hsu, M.C. (2001). PrefixSpan: Mining sequential patterns efficiently by prefix-projected pattern growth. Proc. 17th Int. Conf. Data Eng.**

Google Scholar: [Author Only](#) [Title Only](#) [Author and Title](#)

**Pillitteri, L.J., Peterson, K.M., Horst, R.J., and Torii, K.U. (2011). Molecular profiling of stomatal meristemoids reveals new component of asymmetric cell division and commonalities among stem cell populations in Arabidopsis. Plant Cell 23: 3260–3275.**

Google Scholar: [Author Only](#) [Title Only](#) [Author and Title](#)

**Rowe, M.H., Dong, J., Weimer, A.K., and Bergmann, D.C. (2019). A plant-specific polarity module establishes cell fate asymmetry in the Arabidopsis stomatal lineage. bioRxiv doi: 10.1101/614636.**

Google Scholar: [Author Only](#) [Title Only](#) [Author and Title](#)

**San-Bento, R., Farcot, E., Galletti, R., Creff, A., and Ingram, G. (2014). Epidermal identity is maintained by cell-cell communication via a universally active feedback loop in Arabidopsis thaliana. Plant J. 77: 46–58.**

Google Scholar: [Author Only](#) [Title Only](#) [Author and Title](#)

**Stracke, R., Werber, M., and Weisshaar, B. (2001). The R2R3-MYB gene family in Arabidopsis thaliana. Curr. Opin. Plant Biol. 4: 447–456.**

Google Scholar: [Author Only](#) [Title Only](#) [Author and Title](#)

**Takahashi, K., Shimada, T., Kondo, M., Tamai, A., Mori, M., Nishimura, M., and Hara-Nishimura, I. (2010). Ectopic expression of an esterase, which is a candidate for the unidentified plant cutinase, causes cuticular defects in Arabidopsis thaliana. Plant Cell Physiol. 51: 123–131.**

Google Scholar: [Author Only](#) [Title Only](#) [Author and Title](#)

**Tanaka, T., Tanaka, H., Machida, C., Watanabe, M., and Machida, Y. (2004). A new method for rapid visualization of defects in leaf cuticle reveals five intrinsic patterns of surface defects in Arabidopsis. Plant J. 37: 139–146.**

Google Scholar: [Author Only](#) [Title Only](#) [Author and Title](#)

**Verger, S., Long, Y., Boudaoud, A., and Hamant, O. (2018). A tension-adhesion feedback loop in plant epidermis. eLife 7: 1–25.**

Google Scholar: [Author Only](#) [Title Only](#) [Author and Title](#)

**Wang, H., Ngwenyama, N., Liu, Y., Walker, J.C., and Zhang, S. (2007). Stomatal development and patterning are regulated by environmentally responsive mitogen-activated protein kinases in Arabidopsis. Plant Cell 19: 63–73.**

Google Scholar: [Author Only](#) [Title Only](#) [Author and Title](#)

**Yang, J., Isabel Ordiz, M., Jaworski, J.G., and Beachy, R.N. (2011). Induced accumulation of cuticular waxes enhances drought tolerance in Arabidopsis by changes in development of stomata. Plant Physiol. Biochem. 49: 1448–1455.**

Google Scholar: [Author Only](#) [Title Only](#) [Author and Title](#)

**Yang, W., Pollard, M., Li-Beisson, Y., Beisson, F., Feig, M., and Ohlrogge, J. (2010). A distinct type of glycerol-3-phosphate acyltransferase with sn-2 preference and phosphatase activity producing 2-monoacylglycerol. Proc. Natl. Acad. Sci. USA 107: 12040–12045.**

Google Scholar: [Author Only](#) [Title Only](#) [Author and Title](#)

**Yang, W., Simpson, J.P., Li-Beisson, Y., Beisson, F., Pollard, M., and Ohlrogge, J.B. (2012). A land-plant-specific glycerol-3-phosphate acyltransferase family in Arabidopsis: Substrate specificity, sn-2 preference, and evolution. Plant Physiol. 160: 638–652.**

Google Scholar: [Author Only](#) [Title Only](#) [Author and Title](#)

**Yeats, T.H. and Rose, J.K.C. (2013). The formation and function of plant cuticles. Plant Physiol. 163: 5–20.**

Google Scholar: [Author Only](#) [Title Only](#) [Author and Title](#)

**Yoo, S.D., Cho, Y.H., and Sheen, J. (2007). Arabidopsis mesophyll protoplasts: A versatile cell system for transient gene expression analysis. Nat. Protoc. 2: 1565–1572.**

Google Scholar: [Author Only](#) [Title Only](#) [Author and Title](#)

**Zeiger, E. and Stebbins, G.L. (1972). Developmental genetics in barley: a mutant for stomatal development. Am. J. Bot. 59: 143–148.**

Google Scholar: [Author Only](#) [Title Only](#) [Author and Title](#)

**Zhang, Y., Wang, P., Shao, W., Zhu, J.K., and Dong, J. (2015). The BASL polarity protein controls a MAPK signaling feedback loop in asymmetric cell division. Dev. Cell 33: 136–149.**

Google Scholar: [Author Only](#) [Title Only](#) [Author and Title](#)
